# Supplementary material for: Top-cited articles in medical professionalism: a bibliometric analysis versus altmetric scores
Source: PubMed Central journal article supplement — BMJ Open. 2019 Jul 31;9(7):e029433. doi: 10.1136/bmjopen-2019-029433 (PMC6677941; doi:10.1136/bmjopen-2019-029433), 2019-07-31
Supplement: bmjopen-2019-029433.draft_revisions.pdf [file bmjopen-2019-029433.draft_revisions.pdf]

# BMJ Open

BMJ Open is committed to open peer review. As part of this commitment we make the peer review history of every article we publish publicly available.

When an article is published we post the peer reviewers' comments and the authors' responses online. We also post the versions of the paper that were used during peer review. These are the versions that the peer review comments apply to.

The versions of the paper that follow are the versions that were submitted during the peer review process. They are not the versions of record or the final published versions. They should not be cited or distributed as the published version of this manuscript.

BMJ Open is an open access journal and the full, final, typeset and author-corrected version of record of the manuscript is available on our site with no access controls, subscription charges or pay-per-view fees (<http://bmjopen.bmj.com>).

If you have any questions on BMJ Open's open peer review process please email [info.bmjopen@bmj.com](mailto:info.bmjopen@bmj.com)

# BMJ Open

## Top-Cited Articles in Medical Professionalism: A Bibliometric Analysis versus Altmetric Scores

|                               |                                                                                                                                          |
|-------------------------------|------------------------------------------------------------------------------------------------------------------------------------------|
| Journal:                      | <i>BMJ Open</i>                                                                                                                          |
| Manuscript ID                 | bmjopen-2019-029433                                                                                                                      |
| Article Type:                 | Research                                                                                                                                 |
| Date Submitted by the Author: | 25-Jan-2019                                                                                                                              |
| Complete List of Authors:     | Azer, Samy; King Saud University, Medical Education; Australian Professional Teaching, Azer, Sarah; University Hospital Geelong, Surgery |
| Keywords:                     | Medical professionalism, Altmetric scores, Citation analysis, Top-cited articles, Professional behaviour                                 |
|                               |                                                                                                                                          |

SCHOLARONE™  
Manuscripts

1  
2  
3 **Research Article**  
4  
5  
6  
7  
8

9 **Top-Cited Articles in Medical Professionalism: A**  
10 **Bibliometric Analysis versus Altmetric Scores**  
11  
12  
13  
14  
15

16 Samy A. Azer<sup>1</sup>, MD, PhD, FACG, Sarah Azer<sup>2</sup>, MBBS, FRACS  
17  
18

19 **Samy A. Azer<sup>1</sup>**

20  
21 <sup>1</sup> Professor of medical education and the chair of Curriculum Development and  
22 Research Unit, College of Medicine, King Saud University, Riyadh 11461,  
23 Saudi Arabia.  
24

25  
26 Email address: Azer2000@optusnet.com.au  
27  
28  
29

30  
31 **Sarah Azer<sup>2</sup>**

32 <sup>2</sup>Senior Registrar, St Vincent Hospital, University of Melbourne, Melbourne  
33 3000, Victoria, Australia  
34

35 Email: Drsarahazer@hotmail.com  
36  
37  
38  
39

40 **Corresponding author:**

41 Professor Samy A Azer,  
42 MD; PhD (USyd), MEd (UNSW); FACG; MPH (UNSW); FRSM  
43 Curriculum Development and Research Unit,  
44 College of Medicine, King Saud University  
45 P O Box 2925, Riyadh 11461  
46 Saudi Arabia  
47 Email:azer2000@optusnet.com.au  
48 Telephone: (966) 11-4699178  
49 Fax: (966) 11-4699174  
50  
51  
52  
53

54 Short title: Most cited in Medical Professionalism  
55  
56  
57  
58  
59  
60

## Abstract

**Background:** Citation counts of articles have been used to measure scientific outcomes and assess suitability for grant applications. However, citation counts are not without limitations. With the rise of social media, altmetric scores may provide an alternative assessment tool.

**Objectives:** The aims of this study are to assess the characteristics of highly cited articles in medical professionalism and their altmetric scores.

**Methods:** The Web of Science was searched for top-cited articles in medical professionalism, and the characteristics of each article were identified. The altmetric database was searched to identify report for each identified article. A model to assess the relationship between the number of citations and each of key characteristics as well as altmetric scores was developed.

**Results:** No correlations were found between the number of citations and number of years since publication ( $p=0.192$ ), number of institutes ( $p=0.081$ ), number of authors ( $p=0.270$ ), females in authorship ( $p=0.15$ ), or number of grants ( $p=0.384$ ). The altmetric scores varied from zero to 155, total= 806, median=5.0, (IQR=20). Twitter (54%) and Mendeley (62%) were the most popular altmetric resources. No correlation was found between the number of citations and the altmetric scores ( $p=0.661$ ). To further assess these variables a model was developed using multivariate analysis; did not show significant differences across subgroups. The topics covered were learning and teaching professionalism, curriculum issues, professional and unprofessional behavior, defining and measuring professionalism.

**Conclusions:** No correlation was found between citations and the article parameters. Altmetric scores of articles were not significantly correlated with citations. Highly cited articles were produced mainly by the United States, Canada, and the United Kingdom. The study reflects the emerging role of altmetric and social media in the dissemination of research. Future studies should investigate the specific features of highly cited articles and factors that reinforce distribution of research data among scholars and non-scholars.

### KEYWORDS

Medical professionalism, Professional behavior, Top-cited articles, Citation analysis, Altmetric scores.

## Strengths and Limitations of the study

- Four searches were conducted in the Web of Science database and the altmetric tracks.
- The analysis explored a range of bibliometric parameters.
- The study was limited to top-cited articles in the English language.

## Introduction

Citation counts have been used by universities and funding bodies to measure scientific outcomes, make decisions about professional promotion, and assess suitability for grant applications [1,2]. In this context, it was claimed that the higher the number of citations received, the higher the quality of work and the more likely that other researchers cite the work [3]. While these claims may not necessarily be true, there is a substantial body of evidence that the number of citations correlates with other research achievements including research awards, honors, nomination for Nobel laureateship [3,4], prestigious research positions [5], and academic ranking [6,7]. However, there are factors other than scientific quality, that may affect the decision to cite [8]. For example, there is evidence that early interest in a research publication reflected by online access within a week of publication predicts citations up to 15 years later [9]. Also, scientific citations favor positive results and authors tend to cite primarily works by authors with whom they know and personally acquainted [10,11].

With these limitations in mind, there is a continuous search for alternatives or meters that can complement the citation counts. Currently, there is a rising interest in the altmetric scores. Contrary to traditional citation-based analysis, the altmetrics reflect the widespread attention

1  
2  
3 to published scientific articles and the rise of social media for dissemination and discussion  
4  
5 of scientific information. Therefore, it is possible to quantify discussion of an article on  
6  
7 blogs, news media or other social media platforms [12].  
8  
9

10  
11 Considering these two tools, it was decided to assess highly-cited articles on medical  
12  
13 professionalism [13,14]. The top-cited articles were selected because an earlier study  
14  
15 revealed a number of attributes of articles on medical professionalism [14]. The use of the  
16  
17 altmetric scores in this study in particular is thought to be useful since articles on  
18  
19 professionalism are usually shared on social media.  
20  
21

22  
23 Therefore, the present study aims at the following: First, identify the most cited articles in  
24  
25 medical professionalism and evaluate their characteristics, and study any correlations  
26  
27 between the number of citations and each of their bibliometric characteristics. Second, assess  
28  
29 the impact of such articles on social media by calculating the altmetric scores and conducting  
30  
31 an exploratory analysis examining the altmetric findings compared to citation analysis. The  
32  
33 conduction of multivariate analysis model may provide additional insight into such  
34  
35 evaluation. The findings from this study may enable researchers to identify common features  
36  
37 of articles behind the progress of medical professionalism and key topics discussed over the  
38  
39 last two-three decades. The study may provide more insight into any relationships between  
40  
41 citation analysis and the altmetric scores. The identified list of publications may be useful to  
42  
43 medical educators and those teaching medical professionalism or doing masters or research in  
44  
45 these areas.  
46  
47  
48  
49  
50

## 51 **Methods**

### 52 **Study Design**

53  
54 To achieve the objectives of this study, it was decided to search the Web of Science database  
55  
56 of the Thomson Reuters for highly cited articles and track the citation records of publications  
57  
58  
59  
60

1  
2  
3 identified. Although Scopus and Google Scholar databases also provide citation tracking, it  
4  
5 was decided to limit the search to the Web of Science. This is because the Web of Science is  
6  
7 regularly updated and its 2016-Journal Citation Reports (JCRs) reported over 59 million  
8  
9 citations in its Science Edition and 07 million from its Social Science Edition. In the area of  
10  
11 medical education, medical ethics and bioethics, general medicine, and surgery, the Web of  
12  
13 Science has included 16, 49, 457 and 180 peer-reviewed journals, respectively. Google  
14  
15 Scholar was not included in the search because it is difficult to search, and it is not possible to  
16  
17 identify the number of citations for each year across the last two-three decades, and the  
18  
19 citations in Google Scholar usually include textbooks, monographs, conference proceedings,  
20  
21 as well as non-peer-reviewed work. The Scopus database was not included in our search  
22  
23 because it is not extensive in its coverage and it records only go back to 1966.  
24  
25  
26  
27  
28

29 To achieve the first aim, we planned to identify the highly cited articles in medical  
30  
31 professionalism and their characteristics using three mechanisms: (1) Searching the Web of  
32  
33 Science using keywords, (2) Searching medical education, ethics, general medicine and  
34  
35 surgery journals in the Web of Science, (3) Searching the webpage of journals, and (4)  
36  
37 searching for related resources mentioned in the list of references of articles identified. For  
38  
39 the second aim, the altmetric bookmarklet application was used to obtain the altmetric scores  
40  
41 and construct exploratory analysis examining the role of social media and the different  
42  
43 resources contributing to altmetrics. At the end, we compared these findings with those  
44  
45 obtained from the citation analysis [15,16,17]. A description of the steps used in the search  
46  
47 are discussed below.  
48  
49  
50  
51  
52

### 53 **Searching the Web of Science Database using keywords**

54 Searching the Web of Science database was carried out in the 5<sup>th</sup> of April 2017 by two  
55  
56 researchers (SAA is a professor of medical education with a 20 year-experience in research in  
57  
58 the field of medical education and professionalism, and SA a medical registrar and  
59  
60

1  
2  
3 researcher). The search words used were the following: “Medical professionalism”, “Patient  
4 safety”, “Professional behavior”, “Unprofessional behavior”, “Role modeling”,  
5  
6 “Accountability”, “Faculty training in professionalism”, “Altruism”, “Physician code”,  
7  
8 “Physician charter”, “Medical ethics”, “Integrity”, “Consent”, “Defining medical  
9  
10 professionalism”, “Empathy”, “Compassionate doctor”, “Professional conduct”,  
11  
12 “Collaborative doctor”, “Self-assessment”, “Professional development”, “Resilient doctor”,  
13  
14 “Social justice”, “Patient autonomy”, “Patient Welfare”, “Professional responsibility”,  
15  
16 “Managing conflict”, “Patient confidentiality”, “Quality of care”, “Social contract”, “Team  
17  
18 work and professionalism”, “Personal development”, “Public professionalism”,  
19  
20 “Interpersonal professionalism”, and ‘Intrapersonal professionalism’. These keywords were  
21  
22 identified from the terminology and themes used in defining medical professionalism in six  
23  
24 resources including [18-23]. We also looked at conference proceedings in the field and  
25  
26 websites of organizations and agencies responsible for accreditation of medical education  
27  
28 worldwide including: *The World Federation for Medical Education (WFME)*, *the UK’s*  
29  
30 *General Medical Council (GMC)*, *the Association of American Medical Colleges (AAMC)*,  
31  
32 *the Australian Medical Council (AMC)*, *the Liaison Committee on Medical Education*  
33  
34 *(LCME)*, *and the Quality Assurance of Basic Medical Education (QABME)*, *and documents*  
35  
36 *such as: Tomorrow’s doctors, 2003; The New Doctor, 2004; and General Medical Practice,*  
37  
38 *2001.*  
39  
40  
41  
42  
43  
44  
45  
46  
47

48 For each search word, the results were arranged using a link on the Web of Science database  
49  
50 system “sort-by” – “Time Cited- highest to lowest”. The results showed the articles  
51  
52 organized in a descending order with the articles most frequently cited on the top. The  
53  
54 findings from each search word were then arranged on one Excel sheet in a descending order  
55  
56 based on the number of citations. The results identified by each evaluator were discussed and  
57  
58 duplicate articles were excluded.  
59  
60



## Searching journals in the Web of Science

The second search involved searching all journals in the field of medical education, ethics, general medicine and surgery included in the Web of Science database. These journals are known to publish articles on medical professionalism. They were selected on the basis of the outcomes of the Web of Science search and the references cited by the articles identified. The aims of this second search was to maximize the yield of the search and detect any articles that were possibly missed during the first search. This search was conducted under the same conditions of the first search, by the two researchers, on the same day, and by using the same keywords used in the first search. The journals in medical education that were searched included *Academic Medicine*, *Medical Education*, *Medical Teacher*, *BMC Medical Education*, *Advances in Health Sciences Education Theory, and Practices*, *Teaching and Learning in Medicine*, and *the Journal of Continuing Education in the Health Professions*. The journals searched in general medicine and surgery were *the New England Journal of Medicine*, *the Lancet*, *the British Medical Journal*, *the Journal of the American Medical Association*, *Journal of General Internal Medicine*, *Annals of Internal Medicine*, *Archives of Internal Medicine*, *Canadian Medical Association Journal*, *PLOS Medicine*, *Annals of Surgery*, *Archives of Surgery*, *British Journal of Surgery*, *Perspectives in Biology and Medicine*, *Mayo Clinic Proceedings*, and *the Australian Medical Journal*. The journals in bioethics that were searched included *the American Journal of Bioethics*, *Journal of Medical Ethics*, and *BMC Medical Ethics*. The findings from journals were then arranged on one Excel sheet in a descending order based on the number of citations. The results identified by each evaluator were discussed and duplicate articles were excluded.

## Searching the webpage of journals

To maximise the yield of our search and to ensure that no paper was missed through searching the Web of Science, we conducted a third search using the webpage of the journals mentioned above. We examined the titles of articles listed in each issue of these journals during 2011 and prior years. This search was particularly important as for example, *Teaching and Learning in Medicine* first appeared in Web of Science in 1996 but the journal was published since 1989. Therefore, any relevant articles from this journal or others prior to 1996 would be included.

## Inclusion and Exclusion Criteria

The inclusion criteria were: (i) papers focusing on medical professionalism in the English language, and (ii) articles, reviews, research papers, reports, editorials on any aspect related to medical professionalism in the English language. The exclusion criteria were: (i) articles on medical professionalism in languages other than English, and (ii) articles that focused on education/curriculum or clinical practices and medical professionalism was not the main focus. Articles with identical absolute number of citations were ranked on the basis of the average citation per year (the number of citations obtained divided by the number of years since published) [24]. A copy of all papers included in the list was obtained and read by the evaluators.

It is interesting to note here that none of the articles excluded on the basis of language (not in English) were qualified for inclusion in the list because they had less citation numbers much lower than the article marked number 50 in our list.

## Assessing the Articles

For each of the identified articles (Appendix 1), a full text was obtained and a copy was given to each researcher. The following information was collected: (i) the authors' names and their affiliations, and the number of females contributing to authorship (ii) the number of institutes involved and the city and country of the origin of the publication, (iii) the total number of citations obtained up to the day of searching the database, and the number of yearly citations since publication, (iv) the year of publication and the calculated number of years since publication, and (v) grants/funding bodies stated in the publication and (vi) the 2016-JIF of the journal that published the work.

We also aimed at grouping the identified top-cited articles into categories. We have not used the categories provided by the Web of Science "study type" because we noted that the Web of Science system does not differentiate between "original research" or "articles" and classified both as "articles". For consistency and the purpose of this study, we grouped the articles into four categories - article, review, editorial material, and research. A definition of each category is given in the glossary. Using these definitions, two researchers independently allocated each article under a category. For articles that were difficult to classify or not fitting into the same category, a meeting was held to discuss these articles and a final decision was made.

The topics covered in identified articles were created by each researcher independently by generating key words reflecting the main idea covered in an article and using these words to phrase a short statement that could help in grouping more than one article under one topic. The topics were then discussed in a meeting to harmonize the grouping into a logical, simple and practical approach. Articles covering more than one topic were classified on the basis of the aim of the study, the title and the main outcomes.

### Identification of author's gender

Regarding the data collected for each article, it is important to mention here that the identification of the gender of each author was a challenging task particularly when a journal uses abbreviations of the first and second name rather than the full name, which was the case in three articles. The approach used in order to identify the females in the top-cited articles included (1) searching the Google database to find the university website, personal website of the author, LinkedIn webpage, and ResearchGate account. This approach was particularly useful for authors who could have moved to other universities, (2) searching the university websites not only provided the full names but also provided identification photos of these authors, and in many times a list of their publication records, as well as areas of research/teaching interests (3) Searching the Google Scholar database to identify their accounts, where we can find other publications under their names, the full name or an identification photo showing them. Usually authors of highly-cited articles have other publications related to the same topic, or work with the same co-authors, which could also help in identifying them and tracing them, and (4) In two difficult cases we emailed the corresponding author of these articles for help.

### Altmetric system

The altmetric system comprises, but not limited to, policy documents, news, blogs, tweeters, online reference managers (e.g., Mendeley, CitULike), post-publication peer reviews (e.g., Publons), Social media platforms (e.g., Facebook, Google+, Pinterest), citations on Wikipedia, sites running Stack Exchanges (Q&A), and reviews on Faculty 1000 (F1000) and YouTube. Therefore, altmetric scores may reflect interest of the public as well as clinicians and researchers in a publication and the scores may provide information about the geographical and demographic details of those involved in such online/social media discussions [25].

1  
2  
3 The altmetric program process raw data collected from the above mentioned resources and  
4 the data is weighted according to a system created by altmetrics to reflect the relative  
5 contribution of each source to the total altmetric score. News, Blogs, Wikipedia, policy  
6 documents have a relatively higher weighting values [26]. While Mendeley, and CiteULike  
7 are shown in the report, they do not contribute to the total score.  
8  
9  
10  
11  
12  
13  
14  
15

### 16 **Searching the altmetric system**

17 The search of the altmetric system was conducted on the same day. The scores were  
18 identified using the Altmetric bookmarklet provided by the company [27]. In summary, the  
19 articles were searched on PubMed database (the PMID or DOI are essential for triggering the  
20 altmetric bookmarklet to function). By clicking on the LinkOut link, we identified the  
21 publisher webpage hosting the original article and by clicking the altmetric bookmarklet  
22 application, we can check the attention records for the article. The altmetric attention score  
23 and donut help in identifying the relative quantity and the type of attention received by a  
24 published article. The meaning of the colours included in altmetric donut is explained in this  
25 link [28]. The articles with a grey donut and question mark in the centre indicate that they  
26 have not yet received attention across the sources of altmetric tract and have no scores. Some  
27 of these articles may have DOI or PMID numbers.  
28  
29  
30  
31  
32  
33  
34  
35  
36  
37  
38  
39  
40  
41  
42  
43

### 44 **Statistical Analysis**

45 All analyses were conducted using SPSS Software (IBM SPSS Statistics Premium version  
46 22.0 for Mac OS-SPSS Inc., Chicago, IL, USA) and the results were reported at total, mean,  
47 median, IQR, and percentage. Pearson's correlation coefficient ( $r$ ) was calculated to  
48 determine if the high citation numbers obtained were related to the age of the article. Other  
49 correlations were between the number of citations and the number of authors, the percentage  
50 of subgroups in authorship, the number of institutes, the number of countries involved, the  
51 number of grants received, and the JIF of the journals in which articles were published.  
52  
53  
54  
55  
56  
57  
58  
59  
60

1  
2  
3 Because of the observed differences in the citations of the top articles in the list compared to  
4 those in the bottom of the list, and the variability in the altmetric scores, it was decided to  
5  
6 conduct a multivariate analysis model comprising the effect of number of authors, number of  
7  
8 institutes, number of countries, number of females in authorship, number of grants obtained  
9  
10 on the citation scores and altmetric scores. The inter-rater agreement between evaluators was  
11  
12 calculated using the Fleiss kappa scale [29].  
13  
14  
15  
16  
17

## 18 **Results**

### 19 **Top-Cited Papers Identified**

20 Appendix 1 summarizes the 50 most cited articles in medical professionalism identified by  
21  
22 searching the Web of Science database [30-79], out of a total of 3500 articles identified on  
23  
24 professionalism. The articles are listed in a descending order from 1 to 50 with the highest  
25  
26 absolute citation number is ranked 1 and the article with the lowest citation ranked 50 as per  
27  
28 the day of the search. Articles with the same number of citations were ranked on the basis of  
29  
30 average citation per year. (e.g., the articles ranked 34 and 35 had the same citation number  
31  
32 97, they were allocated to a ranking order based on the calculated citation per year, 13.86 and  
33  
34 7.46, respectively). Other articles that had the same citation number and were ranked on the  
35  
36 basis of their calculated citation per year were articles ranked 36 and 37; 43 and 44; as well  
37  
38 as 46 and 47.  
39  
40  
41  
42  
43  
44  
45

46 Table 1 summarizes the year of publication and article category. The articles were published  
47  
48 over 17 years (from 1994 to 2011). During the period from 1994 to 1999, only 7 articles  
49  
50 (14%) were published. However, the number increased significantly from 2000 to 2005  
51  
52 making a total of 24 (48%) articles. The number in the years from 2006 to 2011 dropped to  
53  
54 19 (38%). No correlation was found between the citation counts of these papers and the  
55  
56 number of years since publication (Pearson correlation ( $r$ ) = 0.188,  $p$  = 0.192).  
57  
58  
59  
60

Table 1. The most cited papers in medical professionalism identified by searching the Web of Knowledge, summarized by year of publication and category

| Article category   | Year of publication: no of articles [Reference] |              |                        |                                    |                           |                              |           |
|--------------------|-------------------------------------------------|--------------|------------------------|------------------------------------|---------------------------|------------------------------|-----------|
|                    | 1994-1996                                       | 1997-1999    | 2000-2002              | 2003-2005                          | 2006-2008                 | 2009-2011                    | Total (%) |
| Article            |                                                 | 2<br>[59,74] | 4<br>[35,46,<br>60,67] | 8<br>[40,47,49,51,<br>53,61,76,64] | 3 [33,65,68]              | 2 [69,75]                    | 19 (38%)  |
| Review             | 1 [78]                                          | 2<br>[32,50] | 2<br>[30,36]           | 4<br>[55,56,62,70]                 |                           | 2 [38,52]                    | 11 (22%)  |
| Editorial material |                                                 | 1 [44]       | 1 [57]                 | 1 [31]                             | 1 [58]                    |                              | 4 (08%)   |
| Research           |                                                 | 1 [42]       |                        | 4<br>[34,37,66,73]                 | 5<br>[43,45,48,5<br>4,71] | 6<br>[39,41,63,72<br>,77,79] | 16 (32%)  |
| Total (%)          | 1 (2%)                                          | 6 (12%)      | 7 (14%)                | 17 (34%)                           | 9 (18%)                   | 10 (20%)                     | 50 (100%) |

The distribution of the medical professionalism topics covered in these articles is summarized in Table 2. The inter-rater agreement between assessors was in the range 0.758 to 0.846

Table 2 The most cited articles in medical professionalism identified by searching the Web of Knowledge, summarized by category and topic

| Topics in medical professionalism                            | Category: number of articles [References] |              |                    |          |           |
|--------------------------------------------------------------|-------------------------------------------|--------------|--------------------|----------|-----------|
|                                                              | Articles                                  | Review       | Editorial material | Research | Total (%) |
| Defining and measuring medical professionalism               | 2 [35,47]                                 | 3 [30,56,62] |                    |          | 5 (10%)   |
| Role modeling, mentoring, and professional clinical practice | 1 [40]                                    | 2 [32,78]    |                    |          | 3 (6%)    |
| Physician charter and professionalism                        |                                           |              | 1 [31]             |          | 1 (2%)    |

|                                                                |                       |          |           |              |           |
|----------------------------------------------------------------|-----------------------|----------|-----------|--------------|-----------|
| Response to conflict, social responses, and social environment | 3 [33,46,61]          | 1 [55]   |           |              | 4 (8%)    |
| Professional and unprofessional behavior/disciplinary actions  | 3 [75,68,74]          | 1 [36]   |           | 3 [34,71,37] | 7(14%)    |
| Empathy and moral development                                  |                       | 1 [38]   |           | 3 [45,48,73] | 4 (8%)    |
| Professional conduct of medical students                       |                       |          |           | 2 [41,63]    | 2 (4%)    |
| Learning/teaching professionalism and curriculum issues        | 5 [49,59,60,65,69,76] | 1 [50]   | 1 [58]    | 1 [42]       | 8 (16%)   |
| Online social networking and professionalism                   | 1 [69]                |          |           | 3 [43,39,72] | 4 (8%)    |
| Quality improvement and evidence-based practices               | 1 [51]                | 1 [52]   |           | 2 [54,79]    | 4 (8%)    |
| Self-assessment                                                | 1 [53]                |          |           | 1 [77]       | 2 (4%)    |
| Public roles and medical professionalism                       | 1 [64]                |          | 2 [44,57] |              | 3 (6%)    |
| Faculty development in medical professionalism                 |                       |          |           | 1 [66]       | 1 (2%)    |
| Medical ethics and end of life care                            | 1 [67]                | 1 [70]   |           |              | 2 (4%)    |
| Total                                                          | 19 (38%)              | 11 (22%) | 4 (8%)    | 16 (32%)     | 50 (100%) |

The articles were published in the following journals: *Academic Medicine* (n=19, 38%), *the Journal of the American Medical Association* (n=9, 18%), *Journal of General Internal Medicine* (n=4, 8%), *Annals of Internal Medicine* (n=4, 8%), *the New England Journal of Medicine* (n=3, 6%), and *Medical Education* (n=3, 6%). It is interesting to note that 24 (48%) articles were published in eight general medicine journal and the remaining were published in



four medical education journals and one journal specialized in bioethics. Most journals have high journal impact factors and are on the top of their field (Table 3). The first author of the top-cited articles was from the United States (n= 37, 74%), Canada (n= 8, 16%), the United Kingdom (n=2, 4%), Germany (n= 1, 2%), Israel (n=1, 2%), and New Zealand (n= 1, 2%).

Table 3. The journals that published the top-cited articles in medical professionalism included in this study, the journal impact factor, the number of papers and the reference numbers

| Journal                                                           | 2016-Journal Impact Factor | Number of papers published [References]                       |
|-------------------------------------------------------------------|----------------------------|---------------------------------------------------------------|
| <i>Journal of the American Medical Association</i>                | 44.405                     | 9 [30,32,33,39,41,42,64,67,75]                                |
| <i>New England Journal of Medicine</i>                            | 72.406                     | 3 [34,44,57]                                                  |
| <i>Academic Medicine</i>                                          | 5.255                      | 19 [35,36,37,38,40,45,46,47,50,52,56,59,60,63,65,68,70,74,77] |
| <i>Journal of General Internal Medicine</i>                       | 3.701                      | 4 [43,48,61,69]                                               |
| <i>Medical Education</i>                                          | 4.005                      | 3 [49,66,72]                                                  |
| <i>Health Affairs</i>                                             | 4.980                      | 1 [51]                                                        |
| <i>Advances in Health Sciences Education Theory and Practices</i> | 1.852                      | 1 [53]                                                        |
| <i>Annals of Internal Medicine</i>                                | 17.135                     | 4 [31,54,71,78]                                               |
| <i>British Medical Journal</i>                                    | 20.785                     | 1 [55]                                                        |
| <i>Medical Teacher</i>                                            | 2.502                      | 2 [58,62]                                                     |
| <i>Canadian Medical Association Journal</i>                       | 6.784                      | 1 [73]                                                        |
| <i>American Journal of Bioethics</i>                              | 6.434                      | 1 [76]                                                        |
| <i>Archives of Internal Medicine</i>                              | 17.333                     | 1 [79]                                                        |

Table 4 summarises the 26 authors who have published two or more papers in medical professionalism. Of these, five authors were the first authors of two or more papers, ten were coauthors of two or more papers, and the remaining eleven were the first authors and coauthors of two or more articles. Top authors were Papadakis, M (n=4; first author of all four papers), and Blank, L (n=4; first author of one paper and coauthor of three). Other top authors are shown in Table 4.

Table 4. Authors and co-authors of two or more articles of the top-cited articles in medical professionalism identified by searching the Web of Science

| Author's name | Number [Reference] |              | Author's name | Number [Reference] |           |
|---------------|--------------------|--------------|---------------|--------------------|-----------|
|               | First author       | Coauthor     |               | First author       | Coauthor  |
| Epstein, RM   | 2 [30,32]          | -            | Greysen, SR   | 1 [69]             | 1 [39]    |
| Blank, L      | 1 [31]             | 3 [33,56,71] | Kind, T       | -                  | 2 [39,69] |
| Kimball, H    | -                  | 2 [31,33]    | Mann, KV      | -                  | 2 [40,77] |
| Brennan, TA   | 1 [33]             | 1 [64]       | Dyrbye, LN    | 1 [41]             | 1 [48]    |
| Rothman, DJ   | 1 [57]             | 1 [33]       | Thomas, MR    | 1 [48]             | 1 [41]    |
| Blumenthal, D | -                  | 2 [33,54]    | Sloan, J      | -                  | 2 [41,48] |
| Papadakis, MA | 4 [34,37,71,74]    | -            | Shanafelt, TD | -                  | 2 [41,48] |
| Teherani, A   | -                  | 2 [34,37]    | Holmboe, ES   | -                  | 2 [71,77] |
| Veloski, JJ   | 1 [56]             | 1 [34]       | Coulehan, J   | 2 [46,47]          | -         |
| Hodgson, CS   | -                  | 2 [34,37]    | Cruess, RL    | 2 [50,58]          | 1 [66]    |
| Swick, HM     | 2 [35,42]          | -            | Eva, KW       | 1 [53]             | 1 [77]    |
| Kretien, KC   | 1 [39]             | 1 [69]       | Wear, D       | 2 [60,76]          | -         |
| Levinson, W   | -                  | 2 [52,75]    |               |                    |           |
| Gruen, RL     | 1 [64]             | 1 [54]       |               |                    |           |

The leadership of universities and institutes that have contributed to the creation of these publications were Massachusetts General Hospital and Harvard Medical School, Boston, Massachusetts, the United States; School of Medicine, University of California, San Francisco, San Francisco, the United States; Jefferson Medical College, Philadelphia, the United States, Dalhousie University, Halifax, Nova Scotia, Canada; Mayo Clinic, Rochester,

1  
2  
3 Minnesota, the United States; Department of Community, Health Sciences, St. George's  
4  
5 Hospital Medical School, London, the United Kingdom; McGill University Faculty of  
6  
7 Medicine, Montreal, Quebec, Canada; and McMaster University, Hamilton, Ontario, Canada.

8  
9  
10 See Appendix 1 for more detail.  
11  
12  
13  
14  
15

### 16 **Characteristics of the Top-Cited Articles**

17 These articles were created by 252 authors, median 4.0, minimum 1, maximum 19, IQR 4,  
18  
19 and the females in authorship were 102, median 2.0, minimum 0, maximum 11, IQR 2. The  
20  
21 institutes involved were 168, median 2.0, minimum 1, maximum 17, IQR 3; the countries  
22  
23 involved were 67, median 1.0, minimum 1, maximum 9, IQR 0; and the grants/funds received  
24  
25 were 35, median 0.0, minimum 0, maximum 8, IQR 1. Significant correlations were found  
26  
27 between the number of citations and the 2016-JIF (Pearson correlation ( $r = 0.318$ ;  $p=0.024$ ),  
28  
29 and the number of countries ( $r = -0.453$ ;  $p= 0.001$ ). No significant correlations were found  
30  
31 between the number of citations and the number of years since publication ( $r=0.188$ ,  
32  
33  $p=0.192$ ), the number of authors ( $r =0.159$ ;  $p= 0.270$ ), number of females in authorship ( $r =$   
34  
35  $0.343$ ;  $p= 0.15$ ), the number of institutes involved ( $r =249$ ;  $p= 0.081$ ), or the number of grants  
36  
37 received ( $r=-0.126$ ;  $p=0.384$ ).  
38  
39  
40  
41  
42  
43  
44

### 45 **The altmetric scores**

46 The altmetric scores and reports were found for 70% of articles. The total scores were 806,  
47  
48 median 5.0, minimum 0.0, maximum 155, IQR 20. No correlation was found between the  
49  
50 number of citations and the total altmetric scores ( $r=0.064$ ;  $p= 0.661$ ). Only 38% of the  
51  
52 articles had readers on CiteULike (mean 1.6, 95% CI 0.4-2.7, median 0.0, minimum 0.0,  
53  
54 maximum 19, IQR 1; while 62% were read Mendeley (mean 72.7, 95% CI 45.2-100.3,  
55  
56 median 39.5, minimum 0.0, maximum 499, IQR 120. The coverage of journal articles by  
57  
58 Twitter was 54% (mean 7.8, 95% CI 2.7-13.0, median 1.5, minimum 0.0, maximum 117,  
59  
60

IQR 10) followed by blogs 38% (mean 1.2, 95% CI 0.6-1.8, median 0.0, minimum 0.0, maximum 7, IQR 1, then policy sources 24% (mean 0.38, 95% CI 0.15-0.61, median 0.0, minimum 0.0, maximum 3, IQR 0.0, then Facebook 20% (mean 0.3, 95% CI 0.07-0.61, median 0.0, minimum 0.0, maximum 6, IQR 0.0). The Wikipedia was the lowest resource. No significant correlation was found between the number of citations and altmetric scores ( $r=0.064$ ;  $p=0.661$ ). The geographic breakdown showed that United States had the highest share, followed by United Kingdom. Other countries identified for some articles were Canada, Mexico, Spain, Australia, Spain, Chile, Netherlands, Portugal, Japan, Columbia, Italy, France and Brazil. We looked at journals' webpages of the top-cited articles and those hosting the altmetric meter; we did not find significant correlation between hosting the altmetric meter and recorded altmetric scores.

### Multivariate analysis

Because of the observed differences in the citations of the top articles in the list compared to those in the bottom of the list, and the variability in the altmetric scores, it was decided to conduct a multivariate analysis comprising the effect of number of authors, number of institutes, number of countries, number of females in authorship, number of grants obtained on the citation scores and altmetric scores (Table 5).

Table 5 Assessing the impact of publication variables on citation scores and altmetric scores using multivariate analysis

| Category (n)               | Citation scores |             | Altmetric scores |            | p-value |
|----------------------------|-----------------|-------------|------------------|------------|---------|
|                            | Mean±SD         | 95% CI      | Mean±SD          | 95% CI     |         |
| Authors: 4 or more (6)     | 228.5±186.4     | 86.5-370.5  | 2.5±4.8          | -41.2-46.2 | 0.762   |
| Authors: 2-3 (16)          | 161.7±211.2     | 74.7-248.6  | 9.9±16.3         | -16.8-36.6 | 0.802   |
| One author (28)            | 166.5±144.3     | 100.8-232.3 | 33.6±69.1        | 13.4-53.9  | 0.803   |
| Institutes: 3 or more (18) | 200.3±219.2     | 118.7-281.9 | 6.0±7.4          | -19.3-31.3 | 0.563   |
|                            |                 |             |                  |            | 0.272   |

|                                |             |             |           |            |       |
|--------------------------------|-------------|-------------|-----------|------------|-------|
| Two institutes (12)            | 131.2±46.6  | 31.2-231.1  | 34.2±97.6 | 3.2-65.2   | 0.541 |
| One institute (20)             | 172.0±170.4 | 94.6-249.5  | 29.8±38.5 | 5.8-53.8   |       |
| Countries: 2 or more (40)      | 169.8±158.9 | 115.1-224.6 | 21.8±55.7 | 4.6-39.1   | 0.411 |
| One country (10)               | 182.7±221.0 | 73.1-292.3  | 24.1±47.3 | -10.4-58.6 | 0.808 |
| Female authors: 2 or more (10) | 263.6±281.9 | 157.1-370.1 | 6.4±8.0   | -27.6-40.4 | 0.151 |
| One female author (14)         | 166.8±187.7 | 76.8-256.8  | 12.4±20.6 | -16.4-41.1 | 0.286 |
| No female author (26)          | 140.4±75.6  | 74.3-206.4  | 33.8±71.5 | 12.7-54.8  | 0.334 |
| Grants: 2 or more (30)         | 197.5±213.1 | 134.6-260.4 | 10.7±16.4 | -8.4-29.9  | 0.451 |
| One grant (15)                 | 36.7±60.4   | 47.7-225.7  | 34.7±86.9 | 7.4-61.9   | 0.132 |
| No grants (5)                  | 128.8±53.7  | -25.3-282.9 | 55.0-63.3 | 7.7-102.3  | 0.394 |

None of the categories studied caused significant differences on the citation scores or the altmetric scores

## Discussion

The aims of this study were to identify the highly-cited papers in medical professionalism and compare their characteristics and citation analysis with the altmetric scores. Currently there is a great interest to examine if there is a relationship between altmetric indicators and citation counts. The question remains can we measure the impact of scientific publications by measuring their social density effects?

The study has identified key topics related to medical professionalism including:

Learning/teaching professionalism and curriculum issues, Professional and unprofessional behaviour/disciplinary actions, Defining and measuring medical professionalism, Response to conflict, social responses, and social environment, Empathy and moral development, Online social networking and professionalism, Quality improvement and evidence-based practices, Role modeling, mentoring and professional clinical practice, and Public roles and medical professionalism. While these topics highlight major issues related to medical

1  
2  
3 professionals, topics related to transition of first-year students from being laypersons to being  
4  
5 members of the medical profession, how medical schools change assessment to focus much  
6  
7 more on a student's attitudes and personal development as a professional, not just on his or  
8  
9 her knowledge of medicine, as well as strategies to introduce new teaching/learning  
10  
11 approaches that facilitate the integration of medical professionalism across the years in the  
12  
13 medical curriculum and demonstration of professional behavior in day-to-day practices may  
14  
15 be lacking [80].  
16  
17

18  
19 The study revealed the characteristics of the 50 most cited articles; the following points are  
20  
21 worth discussion:  
22

23  
24 First, the study demonstrated that there is no significant correlation between the citation  
25  
26 counts and the number of authors, or the number of female authors. The number of authors  
27  
28 and females in authorship varied from one to 19 and from zero to 11, respectively. The two  
29  
30 questions that can be raised in this regards; are we expecting an increase in number of  
31  
32 citations as the number of authors increases? And is the gender of authors a factor affecting  
33  
34 citation counts? Several studies indicated that the number of authors or the gender of authors  
35  
36 are not among the factors affecting the citation received by a publication; factors such as  
37  
38 having a higher level of evidence may be more likely to affect citation counts [81].  
39  
40  
41

42  
43 Although the proportion of women in authorship of original research in the United States in  
44  
45 general has significantly increased in the last four decades and more women are enrolling  
46  
47 Master's and PhD degrees [82], women still compose a minority of the authors of original  
48  
49 research and there are some differences by subfield [83,84]. Recently, an increased  
50  
51 satisfaction about the proportion of women faculty, especially full professors in academic  
52  
53 medicine, has been reported, suggesting an improvement in the balance at least in this  
54  
55 subfield [85].  
56  
57  
58  
59  
60

1  
2  
3 Second, the study showed significant correlation between the citation counts and the number  
4 of countries involved, but not the number of institutes. However, further analysis using  
5 multivariate analysis model did not show significant relationships at different subgroups.  
6  
7

8  
9  
10 While Figg et al [86] reported that there is a correlation between the number of authors and  
11 the number of times an article is cited by other researchers, the work of Garcia-Aroca et al  
12 [87] showed that publishing in English in certain journals and collaborating with certain  
13 authors and institutes increase the visibility of the manuscripts published on the subject.  
14  
15

16  
17 Therefore, it is the quality of collaboration rather than the absolute number of these  
18 parameters. Recently, Tanner-Smith and Polanin showed that studies conducted by more  
19 established authors (have higher *h-indices*) and reported in more prestigious journal outlets  
20 are more likely to be cited by other scholars, even after controlling for various proxies of  
21 study quality [88].  
22  
23

24  
25 Third, the study showed no significant correlation between the number of citations and the  
26 number of grants received. This finding is not surprising. Recently it was shown that too  
27 many of the United States authors of most influential papers in science do not receive NH  
28 funding [89]. Another group of researchers found no association between grant percentile  
29 ranking and grant outcome as assessed by number of top-10% articles per dollar million spent  
30 [90]. Interestingly, the work of Gok et al [91] showed that funding on its own is not a  
31 measure of citation impact but is principally related to funding variety and negatively related  
32 with funding intensity. Also, there was an inverse relationship between the relative frequency  
33 of funding and citation impact.  
34  
35

36  
37 Fourth, the lack of significant correlation between the number of citations and the number of  
38 years since publication may indicate that the higher citations are not due to ageing of articles  
39 but possibly due to the new knowledge discussed and the evidence presented by authors to  
40  
41  
42  
43  
44  
45  
46  
47  
48  
49  
50  
51  
52  
53  
54  
55  
56  
57  
58  
59  
60

1  
2  
3 answer challenging questions. In fact, the majority of these articles (36, 72%) were published  
4  
5 in 2003 to 2011 and the oldest article in the list was published in 1994.  
6  
7

8  
9 The United States, Canada and the United Kingdom contributed most to these articles. The  
10  
11 leadership of universities from these countries in medical professionalism is no surprise, top  
12  
13 universities identified from this study were from the United States- Massachusetts General  
14  
15 Hospital and Harvard Medical School, Boston, Massachusetts; the School of Medicine,  
16  
17 University of California, San Francisco, San Francisco; the Jefferson Medical College,  
18  
19 Philadelphia, and from Canada Dalhousie University, Halifax, Nova Scotia, McGill  
20  
21 University Faculty of Medicine, Montreal, Quebec, and McMaster University, Hamilton,  
22  
23 Ontario, and from the United Kingdom St. George's Hospital Medical School, London.  
24  
25

26  
27  
28 Altmetrics have a number of functions including: First, a record of the degree to which  
29  
30 people, public and academics/clinicians, engaged with a scholarly publication. Second, a  
31  
32 measure of the dissemination of a scholarly work including the geographic and demographic  
33  
34 details of those involved in such discussions on social media channels. Third, possibly an  
35  
36 indirect measure of influence and impact of scholarly work.  
37  
38

39  
40 The idea of "altmetrics" or social web metrics was first proposed by Priem and Hemminger  
41  
42 [92] and is based on the hypothesis that the analysis of scientific outputs and discussions in  
43  
44 social media tools can be used as an alternative to citation bibliometrics created by Garfield  
45  
46 [93]. The hypothesis may bring new insight into the understanding of scientific impact and  
47  
48 the type of relationship between alternative metrics and citation scores. However, currently  
49  
50 there is evidence that the use of social media in promoting and discussing research is low in  
51  
52 the research community. It has been reported that 15-25 % of scientific publications have  
53  
54 some altmetric activities and these activities are observed mostly in recent publications in  
55  
56 social sciences, humanities, medical and life sciences [94]. With these limitations in mind, it  
57  
58  
59  
60



1  
2  
3 is clear that altmetrics open new directions in understanding scientific impact of a publication  
4  
5 not just through peer-review and citation indices, but through assessing other aspects of  
6  
7 impact at society, education, and public domains. However, the instrument is still in the early  
8  
9 stages and the scientific communities are still not well prepared for such change.  
10  
11

12  
13 This study has several strengths, First: the search was conducted by two researchers  
14  
15 independently using four approaches with the aim to maximize the outcomes of the search  
16  
17 and not to miss a publication, Second: the study examined the citation numbers, related  
18  
19 bibliometric parameters, and altmetric scores, the relationships between these variables and  
20  
21 their possible effect on citation counts and altmetric scores were evaluated using correlation  
22  
23 studies and multivariate analysis; Third: the study covered top-cited articles on medical  
24  
25 professionalism over the last two decades. However, this study is not without limitations,  
26  
27 First, we limited the search to Web of Science database, and we have not searched other  
28  
29 databases such as Google Scholar or Scopus for reasons mentioned under methods. Also, we  
30  
31 have searched highly cited journals in the area of medical education, ethics, bioethics, general  
32  
33 medicine and surgery to compensate for using one database; and Second, we limited the  
34  
35 study to articles published in the English language. However, further evaluation revealed that  
36  
37 articles published in languages other than English were not qualified for inclusion and their  
38  
39 citation counts were below the article listed number 50.  
40  
41  
42  
43  
44  
45

## 46 **Conclusions**

47  
48 Using a multivariate analysis model and correlation studies showed that several bibliometric  
49  
50 factors neither correlated with citation scores nor altmetric scores. These variables included,  
51  
52 years since publication, the number of authors, the number of female authors, the number of  
53  
54 institutes, the number of grants received. The number of females in authorship (40% of total  
55  
56 number of authors) highlights the progressive role of females in medical education and the  
57  
58 area of medical professionalism. It may be premature to make conclusions about the lack of  
59  
60

1  
2  
3 correlations between the number of citations and the altmetric scores. However, there is not  
4  
5 enough evidence to support the notion that the altmetric scores can replace bibliometric  
6  
7 analysis.  
8  
9  
10  
11  
12  
13  
14  
15  
16  
17  
18  
19  
20  
21  
22

## 23 **Acknowledgement**

24 Authors wish to thank Diana Sanad for her assistance in reviewing the manuscript.  
25  
26  
27

## 28 **Funding**

29  
30 This work was funded by the College of Medicine Research Center, Deanship of Scientific  
31  
32 Research, King Saud University, Riyadh, Saudi Arabia.  
33  
34  
35  
36

## 37 **Declarations**

38 Ethical approval was not needed because the article is based on searching the data base of  
39  
40 Web of Science and there were no confidential information or human or animal interventions  
41  
42 in the study.  
43  
44  
45  
46

## 47 **Conflicts of Interests**

48 None declared.  
49  
50  
51

## 52 **Authors' contribution**

53 SAA conceived and designed the study; collected and performed the search of databases,  
54  
55 analysis, and interpretation of findings, and drafting the manuscript. SA shared in the search  
56  
57  
58  
59  
60

of databases, analysis of findings and critical revision of the manuscript. Both authors approved the manuscript for publication.

## Provenance and Peer Review

Not commissioned; externally peer reviewed

## Appendix

The content in Appendix 1.

## Data Sharing Statement

The data collected are included in the manuscript and appendix 1.

## References

1. Danthi N, Wu CO, Shi P, Lauer M. Percentile ranking and citation impact of a large cohort of national heart, lung, and blood institute-funded cardiovascular R01 grants. *Circ Res*. 2014 Feb 14;114(4):600-606. [doi: 10.1161/CIRCRESAHA.114.302656] [Medline: 24406983]
2. Costello LC. Is NIH funding the “best science by the best scientists”? A critique of the NIH R01 research grant review policies. *Acad Med*. 2010 May;85(5):775-779. [doi: 10.1097/ACM.0b013e3181d74256] [Medline:20520024].
3. Gast KM, Kuzon WM Jr, Waljee JF. Bibliometric indices and academic promotion within plastic surgery. *Plast Reconstr Surg*. 2014 Nov;134(5):838e-844e. [doi: 10.1097/PRS.0000000000000594] [Medline: 25347660]
4. Klosik DF, Bornholdt S. The citation wake of publications detects nobel laureates' papers. *PLoS One*. 2014 Dec 1;9(12):e113184. [doi: 10.1371/journal.pone.0113184] [Medline: 25437855].
5. Choi M, Holliday EB, Jaggi R, Wilson LD, Fuller CD, Thomas CR Jr. Citation-based Estimation of Scholarly Activity Among Domestic Academic Radiation Oncologists: Five-Year Update. *J Radiat Oncol*. 2014 Mar 1;3(1):115-122. [doi: 10.1007/s13566-013-0103-x] [Medline: 24678385].
6. Susarla HK, Dhar V, Karimbux NY, Tinanoff N. Do standard bibliometric measures correlate with academic rank of full-time pediatric dentistry faculty members? *J Dent Educ*. 2017 Apr;81(4):427-432. [doi: 10.21815/JDE.016.006] [Medline: 28365607].

- 1  
2  
3 7. Aoun SG, Bendok BR, Rahme RJ, Dacey RG Jr, Batjer HH. Standardizing the  
4 evaluation of scientific and academic performance in neurosurgery--critical review  
5 of the "h" index and its variants. *World Neurosurg.* 2013 Nov;80(5):e85-90. [doi:  
6 10.1016/j.wneu.2012.01.052] [Medline: 22381859].  
7  
8
- 9 8. Moustafa K. Aberration of the Citation. *Account Res.* 2016;23(4):230-44. [doi:  
10 10.1080/08989621.2015.1127763] [Medline:26636372].  
11  
12
- 13 9. Perneger TV. Online accesses to medical research articles on publication predicted  
14 citations up to 15 years later. *J Clin Epidemiol.* 2015 Dec;68(12):1440-5. [doi:  
15 10.1016/j.jclinepi.2015.01.024] [Medline: 25728430].  
16  
17
- 18 10. Duyx B, Urlings MJE, Swaen GMH, Bouter LM, Zeegers MP. Scientific Citations  
19 Favor Positive Results: A Systematic Review and Meta-analysis. *J Clin Epidemiol.*  
20 2017 Aug;88:92-101. [doi: 10.1016/j.jclinepi.2017.06.002] [Medline: 28603008].  
21  
22  
23  
24  
25
- 26 11. Bornmann L, Daniel H-D. What do citation counts measure? A review of studies on  
27 citing behavior. *Journal of Documentation* 2008; 64(1):45-80.  
28 [doi.org/10.1108/00220410810844150].  
29  
30
- 31 12. Kolahi J, Iranmanesh P, Khazaei S. Altmetric analysis of 2015 dental literature: a  
32 cross sectional survey. *Br Dent J.* 2017 May 12;222(9):695-699. [doi:  
33 10.1038/sj.bdj.2017.408] [Medline: 28496225].  
34  
35
- 36 13. Kirk LM. Professionalism in medicine: definitions and considerations for teaching.  
37 *Proc (Bayl Univ Med Cent).* 2007 Jan;20(1):13-16 [Medline: 17256035].  
38  
39
- 40 14. Azer SA. Exploring the Top-Cited and Most Influential Articles in Medical  
41 Education. *J Contin Educ Health Prof.* 2016 Summer;36 Suppl 1:S32-41. [doi:  
42 10.1097/CEH.0000000000000085] [Medline: 27584067].  
43  
44
- 45 15. Azer SA. The top-cited articles in medical education: a bibliometric analysis. *Acad*  
46 *Med.* 2015 Aug;90(8):1147-1161. [doi: 10.1097/ACM.0000000000000780] [Medline:  
47 26061861].  
48  
49
- 50 16. Azer SA. Top-Cited Articles in Problem-Based Learning: A Bibliometric Analysis  
51 and Quality of Evidence Assessment. *J Dent Educ.* 2017 Apr;81(4):458-478. [doi:  
52 10.21815/JDE.016.011] [Medline: 28365611].  
53  
54
- 55 17. Azer SA, Azer S. Bibliometric analysis of the top-cited gastroenterology and  
56 hepatology articles. *BMJ Open.* 2016 Feb 8;6(2):e009889. [doi: 10.1136/bmjopen-  
57 2015-009889] [Medline: 26857105].  
58  
59  
60

18. Exploring the ACGME Core Competencies: Professionalism (Part 7 of 7). Available at <https://knowledgeplus.nejm.org/blog/acgme-core-competencies-professionalism/> [Last accessed 30 November 2017].
19. ABIM Foundation. American Board of Internal Medicine; ACP-ASIM Foundation. American College of Physicians American Society of Internal Medicine; European Federation of Internal Medicine. Medical professionalism in the new millennium: a physician charter. *Ann Intern Med.* 2002 Feb 5;136(3):243-246 [Medline: 11827500].
20. O'Sullivan H, van Mook W, Fewtrell R, Wass V. Integrating professionalism into the curriculum: AMEE Guide No. 61. *Med Teach.* 2012;34(2):e64-77. [doi: 10.3109/0142159X.2012.655610] [Medline: 22289014].
21. Birden H, Glass N, Wilson I, Harrison M, Usherwood T, Nass D. Defining professionalism in medical education: a systematic review. *Med Teach.* 2014 Jan;36(1):47-61. [doi: 10.3109/0142159X.2014.850154] [Medline: 24252073].
22. Hafferty FW. Definitions of professionalism: a search for meaning and identity. *Clin Orthop Relat Res.* 2006 Aug;449:193-204. [doi: 10.1097/01.blo.0000229273.20829.d0] [Medline:16770288].
23. Van De Camp K, Vernooij-Dassen MJ, Grol RP, Bottema BJ. How to conceptualize professionalism: a qualitative study. *Med Teach.* 2004 Dec;26(8):696-702. [doi: 10.1080/01421590400019518] [Medline:15763872].
24. Tas F. Majority of the most-cited articles on cutaneous malignant melanoma are published in non-dermatology/melanoma specialized journals. *J Cancer Res Ther.* 2016 Apr-Jun;12(2):612-615. [doi: 10.4103/0973-1482.146094] [Medline: 27461619].
25. Altmetric support. What outputs and sources does altmetric track? Available at <https://help.altmetric.com/support/solutions/articles/6000060968-what-outputs-and-sources-does-altmetric-track-> [Last accessed 30 November 2017].
26. Altmetric support. How is the altmetric attention score calculated? Available at <https://help.altmetric.com/support/solutions/articles/6000060969-how-is-the-altmetric-attention-score-calculated-> [Last accessed 30 November 2017].
27. Altmetric support. Altmetri bookmarklet for researchers. Available at <https://www.altmetric.com/products/free-tools/bookmarklet/> [Last accessed 30 November 2017].

- 1  
2  
3  
4  
5  
6  
7  
8  
9  
10  
11  
12  
13  
14  
15  
16  
17  
18  
19  
20  
21  
22  
23  
24  
25  
26  
27  
28  
29  
30  
31  
32  
33  
34  
35  
36  
37  
38  
39  
40  
41  
42  
43  
44  
45  
46  
47  
48  
49  
50  
51  
52  
53  
54  
55  
56  
57  
58  
59  
60
28. Altmetric. The donut and altmetric attention score. Available at <https://www.altmetric.com/about-our-data/the-donut-and-score/> [Last accessed 30 November 2017].
29. Nelson KP, Edwards D. Measures of agreement between many raters for ordinal classifications. *Stat Med*. 2015 Oct 15;34(23):3116-32. [doi: 10.1002/sim.6546] [Medline: 26095449].
30. Epstein RM, Hundert EM. Defining and assessing professional competence. *JAMA*. 2002 Jan 9;287(2):226-235 [Medline: 11779266].
31. Blank L, Kimball H, McDonald W, Merino J; ABIM Foundation.; ACP Foundation.; European Federation of Internal Medicine. Medical professionalism in the new millennium: a physician charter 15 months later. *Ann Intern Med*. 2003 May 20;138(10):839-841 [Medline: 12755556].
32. Epstein RM. Mindful practice. *JAMA*. 1999 Sep 1;282(9):833-839 [Medline: 10478689].
33. Brennan TA, Rothman DJ, Blank L, Blumenthal D, Chimonas SC, Cohen JJ, Goldman J, Kassirer JP, Kimball H, Naughton J, Smelser N. Health industry practices that create conflicts of interest: a policy proposal for academic medical centers. *JAMA*. 2006 Jan 25;295(4):429-433 [doi: 10.1001/jama.295.4.429] [Medline:16434633].
34. Papadakis MA, Teherani A, Banach MA, Knettler TR, Rattner SL, Stern DT, Veloski JJ, Hodgson CS. Disciplinary action by medical boards and prior behavior in medical school. *N Engl J Med*. 2005 Dec 22;353(25):2673-2682 [doi: 10.1056/NEJMsa052596] [Medline: 16371633].
35. Swick HM. Toward a normative definition of medical professionalism. *Acad Med*. 2000 Jun;75(6):612-616 [Medline: 10875505].
36. Arnold L. Assessing professional behavior: yesterday, today, and tomorrow. *Acad Med*. 2002 Jun;77(6):502-515 [Medline: 12063194].
37. Papadakis MA, Hodgson CS, Teherani A, Kohatsu ND. Unprofessional behavior in medical school is associated with subsequent disciplinary action by a state medical board. *Acad Med*. 2004 Mar;79(3):244-249 [Medline: 14985199].

- 1  
2  
3  
4  
5  
6  
7  
8  
9  
10  
11  
12  
13  
14  
15  
16  
17  
18  
19  
20  
21  
22  
23  
24  
25  
26  
27  
28  
29  
30  
31  
32  
33  
34  
35  
36  
37  
38  
39  
40  
41  
42  
43  
44  
45  
46  
47  
48  
49  
50  
51  
52  
53  
54  
55  
56  
57  
58  
59  
60
38. Neumann M, Edelhäuser F, Tauschel D, Fischer MR, Wirtz M, Woopen C, Haramati A, Scheffer C. Empathy decline and its reasons: a systematic review of studies with medical students and residents. *Acad Med*. 2011 Aug;86(8):996-1009. [doi: 10.1097/ACM.0b013e318221e615] [Medline: 21670661].
39. Chretien KC, Greysen SR, Chretien JP, Kind T. Online posting of unprofessional content by medical students. *JAMA*. 2009 Sep 23;302(12):1309-15. [doi: 10.1001/jama.2009.1387] [Medline: 19773566].
40. Kenny NP, Mann KV, MacLeod H. Role modeling in physicians' professional formation: reconsidering an essential but untapped educational strategy. *Acad Med*. 2003 Dec;78(12):1203-10 [Medline: 14660418].
41. Dyrbye LN, Massie FS Jr, Eacker A, Harper W, Power D, Durning SJ, Thomas MR, Moutier C, Satele D, Sloan J, Shanafelt TD. Relationship between burnout and professional conduct and attitudes among US medical students. *JAMA*. 2010 Sep 15;304(11):1173-80. [doi: 10.1001/jama.2010.1318] [Medline: 20841530].
42. Swick HM, Szenas P, Danoff D, Whitcomb ME. Teaching professionalism in undergraduate medical education. *JAMA*. 1999 Sep 1;282(9):830-832 [Medline: 10478688].
43. Thompson LA, Dawson K, Ferdig R, Black EW, Boyer J, Coutts J, Black NP. The intersection of online social networking with medical professionalism. *J Gen Intern Med*. 2008 Jul;23(7):954-957. [doi: 10.1007/s11606-008-0538-8] [Medline:18612723].
44. Wynia MK, Latham SR, Kao AC, Berg JW, Emanuel LL. Medical professionalism in society. *N Engl J Med*. 1999 Nov 18;341(21):1612-6. [doi: 10.1056/NEJM199911183412112] [Medline: 10577119].
45. Newton BW, Barber L, Clardy J, Cleveland E, O'Sullivan P. Is there hardening of the heart during medical school? *Acad Med*. 2008 Mar;83(3):244-249. [doi: 10.1097/ACM.0b013e3181637837] [Medline:18316868].
46. Coulehan J, Williams PC. Vanquishing virtue: the impact of medical education. *Acad Med*. 2001 Jun;76(6):598-605 [Medline: 11401802].
47. Coulehan J. Viewpoint: today's professionalism: engaging the mind but not the heart. *Acad Med*. 2005 Oct;80(10):892-898 [Medline: 16186604].
48. Thomas MR, Dyrbye LN, Huntington JL, Lawson KL, Novotny PJ, Sloan JA, Shanafelt TD. How do distress and well-being relate to medical student empathy? A multicenter study. *J Gen Intern Med*. 2007 Feb;22(2):177-183 [doi: DOI: 10.1007/s11606-006-0039-6] [Medline: 17356983].

- 1  
2  
3 49. Hilton SR, Slotnick HB. Proto-professionalism: how professionalisation occurs across  
4 the continuum of medical education. *Med Educ*. 2005 Jan;39(1):58-65. [doi:  
5 10.1111/j.1365-2929.2004.02033.x] [Medline: 15612901].  
6  
7
- 8 50. Cruess RL, Cruess SR. Teaching medicine as a profession in the service of healing.  
9 *Acad Med*. 1997 Nov;72(11):941-952 [Medline: 9387815].  
10  
11
- 12 51. Audet AM, Doty MM, Shamasdin J, Schoenbaum SC. Measure, learn, and improve:  
13 physicians' involvement in quality improvement. *Health Aff (Millwood)*. 2005 May-  
14 Jun;24(3):843-853 [doi: 10.1377/hlthaff.24.3.843] [Medline: 15886180].  
15  
16
- 17 52. Wong BM, Etchells EE, Kuper A, Levinson W, Shojania KG. Teaching quality  
18 improvement and patient safety to trainees: a systematic review. *Acad*  
19 *Med*. 2010 Sep;85(9):1425-1439 [doi: 10.1097/ACM.0b013e3181e2d0c6] [Medline:  
20 20543652].  
21  
22
- 23 53. Eva KW, Cunnington JP, Reiter HI, Keane DR, Norman GR. How can I know what I  
24 don't know? Poor self assessment in a well-defined domain. *Adv Health Sci Educ*  
25 *Theory Pract*. 2004;9(3):211-224 [doi: 10.1023/B:AHSE.0000038209.65714.d4]  
26 [Medline: 15316272].  
27  
28
- 29 54. Campbell EG, Regan S, Gruen RL, Ferris TG, Rao SR, Cleary PD, Blumenthal D.  
30 Professionalism in medicine: results of a national survey of physicians. *Ann Intern*  
31 *Med*. 2007 Dec 4;147(11):795-802 [Medline: 18056665].  
32  
33
- 34 55. Littlewood S, Ypinazar V, Margolis SA, Scherpbier A, Spencer J, Dornan T. Early  
35 practical experience and the social responsiveness of clinical education: systematic  
36 review. *BMJ*. 2005 Aug 13;331(7513):387-391 [doi: 10.1136/bmj.331.7513.387]  
37 [Medline: 16096306].  
38  
39
- 40 56. Veloski JJ, Fields SK, Boex JR, Blank LL. Measuring professionalism: a review of  
41 studies with instruments reported in the literature between 1982 and 2002. *Acad*  
42 *Med*. 2005 Apr;80(4):366-370 [Medline: 15793022].  
43  
44
- 45 57. Rothman DJ. Medical professionalism--focusing on the real issues. *N Engl J*  
46 *Med*. 2000 Apr 27;342(17):1284-1286 [doi: 10.1056/NEJM200004273421711]  
47 [Medline: 10787328].  
48  
49
- 50 58. Cruess RL, Cruess SR. Teaching professionalism: general principles. *Med Teach*.  
51 2006 May;28(3):205-208 [doi: 10.1080/01421590600643653] [Medline: 16753716]  
52  
53
- 54 59. Kassebaum DG, Cutler ER. On the culture of student abuse in medical school. *Acad*  
55 *Med*. 1998 Nov;73(11):1149-1158 [Medline: 9834696].  
56  
57
- 58 60. Wear D, Castellani B. The development of professionalism: curriculum matters. *Acad*  
59 *Med*. 2000 Jun;75(6):602-611 [Medline: 10875504].  
60



- 1  
2  
3 61. Suchman AL, Williamson PR, Litzelman DK, Frankel RM, Mossbarger DL, Inui TS;  
4 Relationship-Centered Care Initiative Discovery Team. Toward an informal  
5 curriculum that teaches professionalism. Transforming the social environment of a  
6 medical school. *J Gen Intern Med.* 2004 May;19(5 Pt 2):501-504 [doi:10.1111/j.1525-  
7 1497.2004.30157.x] [Medline: 15109312].  
8  
9
- 10 62. Lynch DC, Surdyk PM, Eiser AR. Assessing professionalism: a review of the  
11 literature. *Med Teach.* 2004 Jun;26(4):366-373.[doi:  
12 10.1080/01421590410001696434] [Medline: 15203852].  
13  
14
- 15 63. Karnieli-Miller O, Vu TR, Holtman MC, Clyman SG, Inui TS. Medical students'  
16 professionalism narratives: a window on the informal and hidden curriculum. *Acad*  
17 *Med.* 2010 Jan;85(1):124-133 [doi: 10.1097/ACM.0b013e3181c42896] [Medline:  
18 20042838].  
19  
20
- 21 64. Gruen RL, Pearson SD, Brennan TA. Physician-citizens--public roles and  
22 professional obligations. *JAMA.* 2004 Jan 7;291(1):94-98 [doi:  
23 10.1001/jama.291.1.94] [Medline: 14709581].  
24  
25
- 26 65. Brainard AH, Brislen HC. Viewpoint: learning professionalism: a view from the  
27 trenches. *Acad Med.* 2007 Nov;82(11):1010-1014 [doi:  
28 10.1097/01.ACM.0000285343.95826.94] [Medline: 17971682].  
29  
30
- 31 66. Steinert Y, Cruess S, Cruess R, Snell L. Faculty development for teaching and  
32 evaluating professionalism: from programme design to curriculum change. *Med*  
33 *Educ.* 2005 Feb;39(2):127-36 [doi: 10.1111/j.1365-2929.2004.02069.x] [Medline:  
34 15679679].  
35  
36
- 37 67. Meisel A, Snyder L, Quill T; American College of Physicians--American Society of  
38 Internal Medicine End-of-Life Care Consensus Panel. Seven legal barriers to end-of-  
39 life care: myths, realities, and grains of truth. *JAMA.* 2000 Nov 15;284(19):2495-  
40 2501 [Medline: 11074780].  
41  
42
- 43 68. Hickson GB, Pichert JW, Webb LE, Gabbe SG. A complementary approach to  
44 promoting professionalism: identifying, measuring, and addressing unprofessional  
45 behaviors. *Acad Med.* 2007 Nov;82(11):1040-1048 [doi:  
46 10.1097/ACM.0b013e31815761ee] [Medline: 17971689].  
47  
48
- 49 69. Greysen SR, Kind T, Chretien KC. Online professionalism and the mirror of social  
50 media. *J Gen Intern Med.* 2010 Nov;25(11):1227-1229 [doi: 10.1007/s11606-010-  
51 1447-1] [Medline: 20632121]  
52  
53
- 54 70. Eckles RE, Meslin EM, Gaffney M, Helft PR. Medical ethics education: where are  
55 we? Where should we be going? A review. *Acad Med.* 2005 Dec;80(12):1143-1152  
56 [Medline: 16306292].  
57  
58  
59  
60

- 1  
2  
3  
4  
5  
6  
7  
8  
9  
10  
11  
12  
13  
14  
15  
16  
17  
18  
19  
20  
21  
22  
23  
24  
25  
26  
27  
28  
29  
30  
31  
32  
33  
34  
35  
36  
37  
38  
39  
40  
41  
42  
43  
44  
45  
46  
47  
48  
49  
50  
51  
52  
53  
54  
55  
56  
57  
58  
59  
60
71. Papadakis MA, Arnold GK, Blank LL, Holmboe ES, Lipner RS. Performance during internal medicine residency training and subsequent disciplinary action by state licensing boards. *Ann Intern Med.* 2008 Jun 3;148(11):869-876 [Medline: 18519932]
  72. MacDonald J, Sohn S, Ellis P. Privacy, professionalism and Facebook: a dilemma for young doctors. *Med Educ.* 2010 Aug;44(8):805-813 [doi: 10.1111/j.1365-2923.2010.03720.x] [Medline: 20633220].
  73. Patenaude J, Niyonsenga T, Fafard D. Changes in students' moral development during medical school: a cohort study. *CMAJ.* 2003 Apr 1;168(7):840-844 [Medline: 12668541]
  74. Papadakis MA, Osborn EH, Cooke M, Healy K. A strategy for the detection and evaluation of unprofessional behavior in medical students. University of California, San Francisco School of Medicine Clinical Clerkships Operation Committee. *Acad Med.* 1999 Sep;74(9):980-990 [Medline: 10498089].
  75. Lesser CS, Lucey CR, Egener B, Braddock CH 3rd, Linas SL, Levinson W. A behavioral and systems view of professionalism. *JAMA.* 2010 Dec 22;304(24):2732-7. [doi: 10.1001/jama.2010.1864] [Medline: 21177508].
  76. Wear D, Kuczewski MG. The professionalism movement: can we pause? *Am J Bioeth.* 2004 Spring;4(2):1-10 [doi: 10.1162/152651604323097600] [Medline: 15186664].
  77. Sargeant J, Armson H, Chesluk B, Dornan T, Eva K, Holmboe E, Lockyer J, Loney E, Mann K, van der Vleuten C. The processes and dimensions of informed self-assessment: a conceptual model. *Acad Med.* 2010 Jul;85(7):1212-20. [doi: 10.1097/ACM.0b013e3181d85a4e] [Medline: 20375832].
  78. Reynolds PP. Reaffirming professionalism through the education community. *Ann Intern Med.* 1994 Apr 1;120(7):609-614.
  79. Aguilar I, Berger ZD, Casher D, Choi RY, Green JB, Harding EG, Jaeger JR, Lavin A, Martin R, Montgomery LG, Morioka-Douglas N, Murphy JA, Oshman L, Picker B, Smith SR, Venkatesh S, Williams M, Wright GM. Good Stewardship Working Group. The "top 5" lists in primary care: meeting the responsibility of professionalism. *Arch Intern Med.* 2011 Aug 8;171(15):1385-1390. [doi:10.1001/archinternmed.2011.231].

- 1  
2  
3  
4  
5 80. Azer SA, Al-Nassar S. Helping new students become medical professionals: what  
6 medical schools can do. *Acad Med.* 2011 Apr;86(4):408. [doi:  
7 10.1097/ACM.0b013e31820dca04] [Medline: 21451269].  
8  
9
- 10 81. Cheng KL, Dodson TB, Egbert MA, Susarla SM. Which Factors  
11 Affect Citation Rates in the Oral and Maxillofacial Surgery Literature? *J Oral*  
12 *Maxillofac Surg.* 2017 Jul;75(7):1313-1318. [doi: 10.1016/j.joms.2017.03.043].  
13  
14
- 15 82. Gonzales LM, Allum JR, Sowell RS. Graduate enrollment and degrees: 2002 to 2012  
16 (survey report). Washington, Dc: Council of Graduate Schools, 2013. Available at  
17 [http://cgsnet.org/ckfinder/userfiles/files/GEDReport\\_2012.pdf](http://cgsnet.org/ckfinder/userfiles/files/GEDReport_2012.pdf) [Last accessed 30  
18 November 2017].  
19  
20
- 21 83. Jagsi R, Guancial EA, Worobey CC, Henault LE, Chang Y, Starr R, Tarbell  
22 NJ, Hylek EM. The "gender gap" in authorship of academic medical literature--a 35-  
23 year perspective. *N Engl J Med.* 2006 Jul 20;355(3):281-287.  
24  
25  
26  
27
- 28 84. Piper CL, Scheel JR, Lee CI, Forman HP. Gender Trends in Radiology Authorship: A  
29 35-Year Analysis. *AJR Am J Roentgenol.* 2016 Jan;206(1):3-7. [doi:  
30 10.2214/AJR.15.15116].  
31  
32
- 33 85. Valantine HA, Grewal D, Ku MC, Moseley J, Shih MC, Stevenson D, Pizzo PA.  
34 The gender gap in academic medicine: comparing results from a multifaceted  
35 intervention for stanford faculty to peer and national cohorts. *Acad Med.* 2014  
36 Jun;89(6):904-11. [doi: 10.1097/ACM.0000000000000245].  
37  
38  
39
- 40 86. Figg WD, Dunn L, Liewehr DJ, Steinberg SM, Thurman PW, Barrett JC, Birkinshaw  
41 J. Scientific collaboration results in higher citation rates of published articles.  
42 *Pharmacotherapy.* 2006 Jun;26(6):759-767. [doi: 10.1592/phco.26.6.759]  
43 [Medline:16716129].  
44  
45
- 46 87. García-Aroca MÁ, Pandiella-Dominique A, Navarro-Suay R, Alonso-Arroyo  
47 A, Granda-Orive JI, Anguita-Rodríguez F, López-García A. Analysis of Production,  
48 Impact, and Scientific Collaboration on Difficult Airway Through the Web of Science  
49 and Scopus (1981-2013). *Anesth Analg.* 2017 Jun;124(6):1886-1896. [doi:  
50 10.1213/ANE.0000000000002058] [Medline: 28452821].  
51  
52
- 53 88. Tanner-Smith EE, Polanin JR. Brief alcohol intervention trials conducted by higher  
54 prestige authors and published in higher impact factor journals are cited more  
55 frequently. *J Clin Epidemiol.* 2016 Jul;75: 119-125 [doi:  
56 10.1016/j.jclinepi.2016.01.028] [Medline: 26854420].  
57  
58  
59  
60

- 1  
2  
3  
4 89. Nicholson JM, Ioannidis JP. Research grants: Conform and be funded. *Nature*. 2012  
5 Dec 6;492(7427):34-36. [doi: 10.1038/492034a] [Medline: 23222591].  
6  
7  
8 90. Lauer MS, Danthi NS, Kaltman J, Wu C. Predicting Productivity Returns on  
9 Investment: Thirty Years of Peer Review, Grant Funding, and Publication of Highly  
10 Cited Papers at the National Heart, Lung, and Blood Institute. *Circ Res*. 2015 Jul  
11 17;117(3):239-243. [doi: 10.1161/CIRCRESAHA.115.306830] [Medline: 26089369].  
12  
13 91. Gok A, Rigby J, Shapira P. The Impact of Research Funding on Scientific Outputs:  
14 Evidence from Six Smaller European Countries. *Journal of the Association for*  
15 *Information Science and Technology* 2016; 67 (3): 715-730.  
16 [doi.org/10.1002/asi.23406].  
17  
18 92. Priem J, Hemminger BH. *Scientometrics 2.0: Toward new metrics of scholarly*  
19 *impact on the social Web*. *First Monday* 2010;15. Available at  
20 <http://firstmonday.org/htbin/cgiwrap/bin/ojs/index.php/fm/article/view/2874/2570>  
21 [Last accessed 30 November 2017].  
22  
23 93. Garfield E. Citation indexing for studying science. *Nature* 1970;227: 669-671  
24 [Medline: 4914589].  
25  
26 94. Sud P, Thelwall M. Evaluating altmetrics. *Scientometrics* 2014; 98:1131-1143 [doi  
27 10.1007/s11192-013-1117-2].  
28  
29  
30  
31  
32  
33  
34  
35  
36  
37

## 38 Glossary

39 **Articles** are scientific written composition representing a substantial advance in the  
40 understanding of a topic or problem. They raise questions, provide thoughtful, critical  
41 analysis and aim at establishing new directions.  
42

43 **Research papers** original studies making systematic investigations into a problem, using  
44 valid and reliable methods in order to establish answers to the research questions made, and  
45 come with conclusions. Research methods used may be qualitative, quantitative or mixed  
46 methods.  
47

48 **Editorial materials** are defined as brief articles that may raise questions, provide current  
49 status or new developments/advances in the field or structured as a commentary.  
50

51 **Reviews** are defined as an article reviewing the progress of knowledge in a particular topic,  
52 critically analysing the current status of knowledge and presenting an understanding of the  
53 subject by discussing related literature. A review should identify gaps in the literature and  
54 highlights future directions for further research.  
55  
56  
57  
58  
59  
60

1  
2  
3  
4  
5  
6  
7  
8  
9  
10  
11  
12  
13  
14  
15  
16  
17  
18  
19  
20  
21  
22  
23  
24  
25  
26  
27  
28  
29  
30  
31  
32  
33  
34  
35  
36  
37  
38  
39  
40  
41  
42  
43  
44  
45  
46  
47  
48  
49  
50  
51  
52  
53  
54  
55  
56  
57  
58  
59  
60

For peer review only

1  
2  
3  
4  
5  
6  
7  
8  
9  
10  
11  
12  
13  
14  
15  
16  
17  
18  
19  
20  
21  
22  
23  
24  
25  
26  
27  
28  
29  
30  
31  
32  
33  
34  
35  
36  
37  
38  
39  
40  
41  
42  
43  
44  
45  
46  
47  
48  
49  
50  
51  
52  
53  
54  
55  
56  
57  
58  
59  
60

For peer review only

1  
2  
3  
4  
5  
6  
7  
8  
9  
10  
11  
12  
13  
14  
15  
16  
17  
18  
19  
20  
21  
22  
23  
24  
25  
26  
27  
28  
29  
30  
31  
32  
33  
34  
35  
36  
37  
38  
39  
40  
41  
42  
43  
44  
45  
46

Appendix 1.

The most cited articles in medical professionalism identified by searching the Web of Science, showing the number of citations and altmetric scores<sup>a</sup>

| Rank | Authors, Year [Reference]               | Article ( <i>Journal</i> )                                                                                                                                           | 2015-JIF | Category           | Number of citations, Web of Knowledge | Average citation per year <sup>b</sup> | Altmetric scores <sup>c</sup> | Origin: First author's organization, location (country)                                       |
|------|-----------------------------------------|----------------------------------------------------------------------------------------------------------------------------------------------------------------------|----------|--------------------|---------------------------------------|----------------------------------------|-------------------------------|-----------------------------------------------------------------------------------------------|
| 1    | Epstein and Hundert, 2002 <sup>30</sup> | Defining and assessing professional competence. ( <i>Journal of the American Medical Association</i> ).                                                              | 37.684   | Review             | 947                                   | 63.13                                  | 24                            | University of Rochester School of Medicine and Dentistry, Rochester, New York (United States) |
| 2    | Blank et al, 2003 <sup>31</sup>         | Medical professionalism in the new millennium: a physician charter 15 months later. ( <i>Annals of Internal Medicine</i> ).                                          | 16.593   | Editorial Material | 804                                   | 53.60                                  | 2                             | ABIM Foundation, 510 Walnut Street, Suite 1700, Philadelphia, Pennsylvania, (United States)   |
| 3    | Epstein, 1999 <sup>32</sup>             | Mindful practice. ( <i>Journal of the American Medical Association</i> ).                                                                                            | 37.684   | Review             | 588                                   | 32.66                                  | 12                            | University of Rochester School of Medicine and Dentistry, Rochester, New York (United States) |
| 4    | Brennan et al, 2006 <sup>33</sup>       | Health industry practices that create conflicts of interest: a policy proposal for academic medical centers. ( <i>Journal of the American Medical Association</i> ). | 37.684   | Article            | 400                                   | 36.36                                  | 37                            | Brigham and Women's Hospital, Harvard Medical School, Boston, Massachusetts (United States)   |
| 5    | Papadakis, et al, 2005 <sup>34</sup>    | Disciplinary action by medical boards and prior behavior in medical school. ( <i>New England Journal of Medicine</i> ).                                              | 59.558   | Research           | 313                                   | 26.08                                  | 34                            | School of Medicine, University of California, San Francisco, San Francisco, (United States).  |

|    |                                     |                                                                                                                                                    |        |          |     |       |     |                                                                                                                                                         |
|----|-------------------------------------|----------------------------------------------------------------------------------------------------------------------------------------------------|--------|----------|-----|-------|-----|---------------------------------------------------------------------------------------------------------------------------------------------------------|
| 6  | Swick, 2000 <sup>35</sup>           | Toward a normative definition of medical professionalism. ( <i>Academic Medicine</i> ).                                                            | 4.194  | Article  | 239 | 14.05 | 0   | Institute of Medicine and Humanities, Saint Patrick Hospital and the University of Montana, Missoula ( <i>United States</i> ).                          |
| 7  | Arnold, 2002 <sup>36</sup>          | Assessing professional behavior: yesterday, today, and tomorrow. ( <i>Academic Medicine</i> )                                                      | 4.194  | Review   | 211 | 14.07 | 0   | University of Missouri-Kansas City School of Medicine, ( <i>United States</i> ).                                                                        |
| 8  | Papadakis et al, 2004 <sup>37</sup> | Unprofessional behavior in medical school is associated with subsequent disciplinary action by a state medical board. ( <i>Academic Medicine</i> ) | 4.194  | Research | 208 | 16.00 | 2   | Department of Medicine, University of California, San Francisco ( <i>United States</i> )                                                                |
| 9  | Neumann et al, 2011 <sup>38</sup>   | Empathy decline and its reasons: a systematic review of studies with medical students and residents. ( <i>Academic Medicine</i> )                  | 4.194  | Review   | 202 | 33.67 | 155 | Integrative and Anthroposophic Medicine, Faculty of Health, Department of Medicine, University of Witten/Herdecke, ( <i>Germany</i> ).                  |
| 10 | Chretien et al, 2009 <sup>39</sup>  | Online posting of unprofessional content by medical students. ( <i>Journal of the American Medical Association</i> )                               | 37.684 | Research | 179 | 22.38 | 55  | Medical Center and Department of Medicine, George Washington University School of Medicine and Health Sciences, Washington, DC ( <i>United States</i> ) |



|    |                                    |                                                                                                                                                        |        |                    |     |       |    |                                                                                                                      |
|----|------------------------------------|--------------------------------------------------------------------------------------------------------------------------------------------------------|--------|--------------------|-----|-------|----|----------------------------------------------------------------------------------------------------------------------|
| 11 | Kenny et al, 2003 <sup>40</sup>    | Role modeling in physicians' professional formation: reconsidering an essential but untapped educational strategy. ( <i>Academic Medicine</i> ).       | 4.194  | Article            | 176 | 12.57 | 0  | Department of Bioethics, Dalhousie University Faculty of Medicine, Halifax, Nova Scotia, ( <i>Canada</i> ).          |
| 12 | Dyrbye et al, 2010 <sup>41</sup>   | Relationship between burnout and professional conduct and attitudes among US medical students. ( <i>Journal of the American Medical Association</i> ). | 37.684 | Research           | 170 | 24.28 | 80 | Mayo Clinic College of Medicine, Rochester, Minnesota, ( <i>United States</i> )                                      |
| 13 | Swick et al, 1999 <sup>42</sup>    | Teaching professionalism in undergraduate medical education. ( <i>Journal of the American Medical Association</i> ).                                   | 37.684 | Research           | 168 | 9.33  | 0  | Association of American Medical Colleges, Washington, DC ( <i>United States</i> )                                    |
| 14 | Thompson et al, 2008 <sup>43</sup> | The intersection of online social networking with medical professionalism. ( <i>Journal of General Internal Medicine</i> ).                            | 3.494  | Research           | 166 | 18.44 | 19 | Department of Pediatrics, College of Medicine, University of Florida, Gainesville, Florida, ( <i>United States</i> ) |
| 15 | Wynia et al, 1999 <sup>44</sup>    | Medical professionalism in society ( <i>New England Journal of Medicine</i> )                                                                          | 59.558 | Editorial Material | 165 | 9.17  | 6  | American Medical Association, Chicago, Illinois ( <i>United States</i> ).                                            |
| 16 | Newton et al, 2008 <sup>45</sup>   | Is there hardening of the heart during medical school? ( <i>Academic Medicine</i> )                                                                    | 4.194  | Research           | 164 | 18.22 | 34 | University of Arkansas for Medical Sciences, 4301 W. Markham St., Arkansas ( <i>United States</i> ).                 |

|    |                                           |                                                                                                                                         |       |          |     |       |    |                                                                                                                 |
|----|-------------------------------------------|-----------------------------------------------------------------------------------------------------------------------------------------|-------|----------|-----|-------|----|-----------------------------------------------------------------------------------------------------------------|
| 17 | Coulehan and Williams, 2001 <sup>46</sup> | Vanquishing virtue: The impact of medical education ( <i>Academic Medicine</i> ).                                                       | 4.194 | Article  | 163 | 10.19 | 0  | Helath Science Center, State University of New York at Stony Brook, ( <i>United States</i> )                    |
| 18 | Coulehan, 2005 <sup>47</sup>              | Viewpoint. Today's professionalism: Emerging the mind but not the heart ( <i>Academic Medicine</i> ).                                   | 4.194 | Article  | 151 | 12.58 | 0  | Helath Science Center, State University of New York at Stony Brook, ( <i>United States</i> )                    |
| 19 | Thomas et al, 2007 <sup>48</sup>          | How do distress and well-being relate to medical student empathy? A multicenter study. ( <i>Journal of General Internal Medicine</i> ). | 3.494 | Research | 135 | 13.50 | 0  | Department of Internal Medicine, Mayo Clinic, Rochester, Minnesota, ( <i>United States</i> )                    |
| 20 | Hilton and Slotnick, 2005 <sup>49</sup>   | Proto-professionalism: how professionalisation occurs across the continuum of medical education. ( <i>Medical Education</i> ).          | 3.369 | Article  | 134 | 11.17 | 4  | Department of Community Health Sciences, St. George's Hospital Medical School, London ( <i>United Kingdom</i> ) |
| 21 | Cruess and Cruess, 1997 <sup>50</sup>     | Teaching medicine as a profession in the service of healing. ( <i>Academic Medicine</i> )                                               | 4.194 | Review   | 131 | 6.55  | 0  | McGill University Faculty of Medicine, Montreal, Quebec, ( <i>Canada</i> ).                                     |
| 22 | Audet et al, 2005 <sup>51</sup>           | Measure, learn, and improve: physicians' involvement in quality improvement. <i>Health Affairs (Millwood)</i> .                         | 5.230 | Article  | 126 | 10.5  | 12 | American Medical Association, Ccommonwealth Fund, New York City, NY, ( <i>United States</i> ).                  |

|    |                                      |                                                                                                                                                         |        |                    |     |       |   |                                                                                                                                     |
|----|--------------------------------------|---------------------------------------------------------------------------------------------------------------------------------------------------------|--------|--------------------|-----|-------|---|-------------------------------------------------------------------------------------------------------------------------------------|
| 23 | Wong et al, 2010 <sup>52</sup>       | Teaching quality improvement and patient safety to trainees: a systematic review. ( <i>Academic Medicine</i> )                                          | 4.194  | Review             | 122 | 17.43 | 3 | Department of Medicine, University of Toronto, Toronto, Ontario, ( <i>Canada</i> ).                                                 |
| 24 | Eva et al, 2004 <sup>53</sup>        | How can I know what I don't know? Poor self assessment in a well-defined domain. ( <i>Advances in Health Sciences Education Theory and Practices.</i> ) | 2.452  | Article            | 120 | 9.23  | 7 | Program for Educational Research and Development, Room 101, Building T-13, McMaster University, Hamilton, Ontario ( <i>Canada</i> ) |
| 25 | Campbell et al, 2007 <sup>54</sup>   | Professionalism in medicine: results of a national survey of physicians. ( <i>Annals of Internal Medicine</i> ).                                        | 16.593 | Research           | 114 | 11.40 | 7 | Massachusetts General Hospital, Institute for Health Policy, Boston, Massachusetts ( <i>United States</i> )                         |
| 26 | Littlewood et al, 2005 <sup>55</sup> | Early practical experience and the social responsiveness of clinical education: systematic review. ( <i>British Medical Journal</i> )                   | 19.697 | Review             | 111 | 9.25  | 1 | University of Manchester School of Medicine, Manchester ( <i>United Kingdom</i> ).                                                  |
| 27 | Veloski et al, 2005 <sup>56</sup>    | Measuring professionalism: a review of studies with instruments reported in the literature between 1982 and 2002. ( <i>Academic Medicine</i> ).         | 4.194  | Review             | 103 | 8.58  | 0 | Jefferson Medical College, Philadelphia, Pennsylvania ( <i>United States</i> )                                                      |
| 28 | Rothman, 2000 <sup>57</sup>          | Medical professionalism--focusing on the real issues. ( <i>New England Journal of Medicine</i> )                                                        | 59.558 | Editorial Material | 102 | 6.00  | 3 | Columbia University College of Physicians and Surgeons, New York, ( <i>United States</i> ).                                         |

|    |                                          |                                                                                                                                                                      |       |                    |     |      |    |                                                                                                                                                |
|----|------------------------------------------|----------------------------------------------------------------------------------------------------------------------------------------------------------------------|-------|--------------------|-----|------|----|------------------------------------------------------------------------------------------------------------------------------------------------|
| 29 | Cruess and Cruess, 2006 <sup>58</sup>    | Teaching Professionalism: general principles ( <i>Medical Teacher</i> ).                                                                                             | 2.355 | Editorial Material | 101 | 9.18 | 3  | Centre for Medical Education, Lady Meredith House, McGill University, Montreal, Quebec, ( <i>Canada</i> ).                                     |
| 30 | Kassebaum and Cutler, 1998 <sup>59</sup> | On the culture of student abuse in medical school ( <i>Academic Medicine</i> )                                                                                       | 4.194 | Article            | 101 | 5.32 | 0  | Division of Medical School Standards and Assessment, Association of American Medical Colleges (AAMC), Washington, DC ( <i>United States</i> ). |
| 31 | Wear and Castellani, 2000 <sup>60</sup>  | The development of professionalism: Curriculum matters ( <i>Academic Medicine</i> )                                                                                  | 4.194 | Article            | 100 | 5.88 | 0  | Northeastern Ohio Universities College of Medicine, Rootstown ( <i>United States</i> ).                                                        |
| 32 | Suchman et al, 2004 <sup>61</sup>        | Toward an informal curriculum that teaches professionalism. Transforming the social environment of a medical school. ( <i>Journal of General Internal Medicine</i> ) | 3.494 | Article            | 99  | 7.61 | 21 | Relationship-Centered Healthcare, Rochester, New York ( <i>United States</i> ).                                                                |
| 33 | Lynch et al, 2004 <sup>62</sup>          | Assessing professionalism: a review of the literature ( <i>Medical Teacher</i> )                                                                                     | 2.355 | Review             | 98  | 7.54 | 1  | Accreditation Council for Graduate Medical Education, Chicago, Illinois, ( <i>United States</i> )                                              |

|    |                                           |                                                                                                                                           |        |          |    |       |    |                                                                                                                                                                  |
|----|-------------------------------------------|-------------------------------------------------------------------------------------------------------------------------------------------|--------|----------|----|-------|----|------------------------------------------------------------------------------------------------------------------------------------------------------------------|
|    |                                           |                                                                                                                                           |        |          |    |       |    |                                                                                                                                                                  |
| 34 | Karnieli-Miller et al, 2010 <sup>63</sup> | Medical students' professionalism narratives: a window on the informal and hidden curriculum. ( <i>Academic Medicine</i> )                | 4.194  | Research | 97 | 13.86 | 20 | Department of Community Mental Health, Focus for Excellence in Patient-Professional Relationships in Health Care, University of Haifa, Haifa, ( <i>Israel</i> ). |
| 35 | Gruen et al, 2004 <sup>64</sup>           | Physician-citizens- Public roles and professional obligations ( <i>Journal of the American Medical Association</i> )                      | 37.684 | Article  | 97 | 7.46  | 14 | Harvard School of Public Health, Harvard Medical School, Boston, Mass, ( <i>United States</i> )                                                                  |
| 36 | Brainard and Brislen, 2007 <sup>65</sup>  | Viewpoint: Learning professionalism: A view from the trenches ( <i>Academic Medicine</i> ).                                               | 4.194  | Article  | 96 | 9.60  | 14 | University of New Mexico School of Medicine, Albuquerque, New Mexico, ( <i>United States</i> ).                                                                  |
| 37 | Steinert et al, 2005 <sup>66</sup>        | Faculty development for teaching and evaluating professionalism: from programme design to curriculum change. ( <i>Medical Education</i> ) | 3.369  | Research | 96 | 8.00  | 0  | Centre for Medical Education, Faculty of Medicine, McGill University, Lady Meredith House, Montreal, Quebec, ( <i>Canada</i> ).                                  |
| 38 | Meisel et al, 2000 <sup>67</sup>          | Seven legal barriers to end-of-life care- Myths, realities, and grains of truth ( <i>Journal of the American Medical Association</i> )    | 37.684 | Article  | 95 | 5.59  | 0  | Center for Ethics and Professionalism, American College of Physicians- American Society of Internal Medicine, Philadelphia, PA ( <i>United States</i> )          |

|    |                                     |                                                                                                                                                               |        |          |    |       |    |                                                                                                                                                  |
|----|-------------------------------------|---------------------------------------------------------------------------------------------------------------------------------------------------------------|--------|----------|----|-------|----|--------------------------------------------------------------------------------------------------------------------------------------------------|
| 39 | Hickson, et al, 2007 <sup>68</sup>  | A complementary approach to promoting professionalism: identifying, measuring, and addressing unprofessional behaviors. ( <i>Academic Medicine</i> ).         | 4.194  | Article  | 93 | 9.30  | 18 | Department of Medical Education and Administration, University Medical Center, Nashville, Tennessee ( <i>United States</i> )                     |
| 40 | Greysen et al, 2010 <sup>69</sup>   | Online professionalism and the mirror of social media ( <i>Journal of General Internal Medicine</i> ).                                                        | 3.494  | Article  | 91 | 13.00 | 61 | Yale University School of Medicine, New Haven, CT ( <i>United States</i> ).                                                                      |
| 41 | Eckles et al, 2005 <sup>70</sup>    | Medical ethics education: where are we? Where should we be going? A review. ( <i>Academic Medicine</i> )                                                      | 4.194  | Review   | 90 | 7.50  | 9  | Division of Hematology/Oncology, Indiana University School of Medicine, Indianapolis, IN ( <i>United States</i> )                                |
| 42 | Papadakis et al, 2008 <sup>71</sup> | Performance during internal medicine residency training and subsequent disciplinary action by state licensing boards. ( <i>Annals of Internal Medicine</i> ). | 16.593 | Research | 89 | 9.89  | 9  | University of California at San Francisco, San Francisco, California ( <i>United States</i> ).                                                   |
| 43 | MacDonald et al, 2010 <sup>72</sup> | Privacy, professionalism and Facebook: a dilemma for young doctors. ( <i>Medical Education</i> )                                                              | 3.369  | Research | 87 | 12.43 | 27 | Department of Psychological Medicine, University of Otago, Wellington School of Medicine and Health Sciences, Wellington ( <i>New Zealand</i> ). |

|    |                                        |                                                                                                                                                                                                                              |        |          |    |       |    |                                                                                                                                                 |
|----|----------------------------------------|------------------------------------------------------------------------------------------------------------------------------------------------------------------------------------------------------------------------------|--------|----------|----|-------|----|-------------------------------------------------------------------------------------------------------------------------------------------------|
| 44 | Patenaude et al, 2003 <sup>73</sup>    | Changes in students' moral development during medical school: a cohort study. ( <i>Canadian Medical Association Journal</i> ).                                                                                               | 6.724  | Research | 87 | 6.21  | 10 | Faculty of Medicine, University of Sherbrooke and the Centre for Clinical Research, Centre hospitalier universitaire de Sherbrooke, QC (Canada) |
| 45 | Papadakis et al, 1999 <sup>74</sup>    | A strategy for the detection and evaluation of unprofessional behavior in medical students. University of California, San Francisco School of Medicine Clinical Clerkships Operation Committee. ( <i>Academic Medicine</i> ) | 4.194  | Article  | 86 | 4.77  | 3  | University of California at San Francisco, San Francisco, California ( <i>United States</i> ).                                                  |
| 46 | Lesser et al, 2010 <sup>75</sup>       | A behavioral and systems view of professionalism ( <i>Journal of the American Medical Association</i> )                                                                                                                      | 37.684 | Article  | 83 | 11.86 | 36 | Foundation Programs, American Board of Internal Medicine Foundation, Philadelphia, Pennsylvania, ( <i>United States</i> )                       |
| 47 | Wear and Kuczewski, 2004 <sup>76</sup> | The professionalism movement: Can we pause? ( <i>American Journal of Bioethics</i> )                                                                                                                                         | 6.500  | Article  | 83 | 6.38  | 0  | College of Medicine, Northeastern Ohio Universities, ( <i>United States</i> ).                                                                  |
| 48 | Sargeant et al, 2010 <sup>77</sup>     | The process and dimensions of informed self-assessment: a conceptual model ( <i>Academic Medicine</i> )                                                                                                                      | 4.194  | Research | 82 | 11.71 | 2  | Dalhousie University, Halifax, Nova Scotia, ( <i>Canada</i> ).                                                                                  |
| 49 | Reynolds, 1994 <sup>78</sup>           | Reaffirming professionalism through the education community ( <i>Annals of Internal Medicine</i> )                                                                                                                           | 16.593 | Review   | 80 | 3.48  | 0  | Robert Wood Johnson Foundation, Clinical Scholars Program, University of Pennsylvania                                                           |

|    |                                         |                                                                                                                                    |        |          |    |       |    |                                                                                                 |
|----|-----------------------------------------|------------------------------------------------------------------------------------------------------------------------------------|--------|----------|----|-------|----|-------------------------------------------------------------------------------------------------|
|    |                                         |                                                                                                                                    |        |          |    |       |    | School of Medicine,<br>Philadelphia ( <i>United States</i> )                                    |
| 50 | Aguilar<br>et al,<br>2011 <sup>79</sup> | The “top 5” lists in primary care<br>meeting the responsibility of<br>professionalism ( <i>Archives of Internal<br/>Medicine</i> ) | 17.333 | Research | 78 | 13.00 | 61 | School of Medicine,<br>University of Colorado,<br>Aurora, Colorado ( <i>United<br/>States</i> ) |

<sup>a</sup> The search was conducted in May 2017 by searching the Web of Knowledge (1900 to 2016).

<sup>b</sup> For articles with the same number of citations, the average citation per year (number of citations/number of years since publication) was used to judge the ranking. Articles with a higher average citation per year were considered higher in ranking than an article with the same number of citations but a lower average citation per year.

<sup>c</sup> The Altmetric scores were calculated at the publisher website of each article by using the Altmetric Bookmarklet Application (<https://www.altmetric.com/products/free-tools/bookmarklet/>).



1  
2  
3  
4  
5  
6  
7  
8  
9  
10  
11  
12  
13  
14  
15  
16  
17  
18  
19  
20  
21  
22  
23  
24  
25  
26  
27  
28  
29  
30  
31  
32  
33  
34  
35  
36  
37  
38  
39  
40  
41  
42  
43  
44  
45  
46

For peer review only

# BMJ Open

## Top-Cited Articles in Medical Professionalism: A Bibliometric Analysis versus Altmetric Scores

|                                 |                                                                                                                                          |
|---------------------------------|------------------------------------------------------------------------------------------------------------------------------------------|
| Journal:                        | <i>BMJ Open</i>                                                                                                                          |
| Manuscript ID                   | bmjopen-2019-029433.R1                                                                                                                   |
| Article Type:                   | Research                                                                                                                                 |
| Date Submitted by the Author:   | 26-Apr-2019                                                                                                                              |
| Complete List of Authors:       | Azer, Samy; King Saud University, Medical Education; Australian Professional Teaching, Azer, Sarah; University Hospital Geelong, Surgery |
| <b>Primary Subject Heading</b>: | Medical education and training                                                                                                           |
| Secondary Subject Heading:      | Health informatics                                                                                                                       |
| Keywords:                       | Medical professionalism, Altmetric scores, Citation analysis, Top-cited articles, Professional behaviour                                 |
|                                 |                                                                                                                                          |

SCHOLARONE™  
Manuscripts

1  
2  
3 **Amended version: Research Article**  
4  
5  
6  
7  
8

9  
10 **Top-Cited Articles in Medical Professionalism: A**  
11 **Bibliometric Analysis versus Altmetric Scores**  
12  
13  
14

15  
16 Samy A. Azer<sup>1</sup>, MD, PhD, FACG, Sarah Azer<sup>2</sup>, MBBS, FRACS  
17  
18

19  
20 **Samy A. Azer<sup>1</sup>**

21 <sup>1</sup> Professor of medical education and the chair of Curriculum Development and  
22 Research Unit, College of Medicine, King Saud University, Riyadh 11461,  
23 Saudi Arabia.  
24

25  
26 Email address: Azer2000@optusnet.com.au  
27  
28  
29

30  
31 **Sarah Azer<sup>2</sup>**

32 <sup>2</sup>Senior Registrar, St Vincent Hospital, University of Melbourne, Melbourne  
33 3000, Victoria, Australia  
34

35 Email: Drsarahazer@hotmail.com  
36  
37  
38  
39

40 **Corresponding author:**

41 Professor Samy A Azer,  
42 MD; PhD (USyd), MEd (UNSW); FACG; MPH (UNSW); FRSM  
43 Curriculum Development and Research Unit,  
44 College of Medicine, King Saud University  
45 P O Box 2925, Riyadh 11461  
46 Saudi Arabia  
47 Email: azer2000@optusnet.com.au  
48 Telephone: (966) 11-4699178  
49 Fax: (966) 11-4699174  
50  
51  
52  
53

54 **Short title: Most cited in Medical Professionalism**  
55  
56  
57  
58  
59  
60

## Abstract

Citation counts of articles have been used to measure scientific outcomes and assess suitability for grant applications. However, citation counts are not without limitations. With the rise of social media, altmetric scores may provide an alternative assessment tool.

**Objectives:** The aims of study are to assess the characteristics of highly cited articles in medical professionalism and their altmetric scores.

**Methods:** The Web of Science was searched for top-cited articles in medical professionalism, and the characteristics of each article were identified. The altmetric database was searched to identify report for each identified article. A model to assess the relationship between the number of citations and each of key characteristics as well as altmetric scores was developed.

**Results:** No correlations were found between the number of citations and number of years since publication ( $p=0.192$ ), number of institutes ( $p=0.081$ ), number of authors ( $p=0.270$ ), females in authorship ( $p=0.150$ ), or number of grants ( $p=0.384$ ). The altmetric scores varied from zero to 155, total= 806, median=5.0, (IQR=20). Twitter (54%) and Mendeley (62%) were the most popular altmetric resources. No correlation was found between the number of citations and the altmetric scores ( $p=0.661$ ). However, a correlation was found for articles published in 2007 and after ( $n=17$ ,  $p=0.023$ ). To further assess these variables a model was developed using multivariate analysis; did not show significant differences across subgroups. The topics covered were learning and teaching professionalism, curriculum issues, professional and unprofessional behavior.

**Conclusions:** Altmetric scores of articles were significantly correlated with citations counts for articles published in 2007 and after. Highly cited articles were produced mainly by the United States, Canada, and the United Kingdom. The study reflects the emerging role of social media in research dissemination. Future studies should investigate the specific features of highly cited articles and factors reinforcing distribution of research data among scholars and non-scholars.

### KEYWORDS

Medical professionalism, Professional behavior, Top-cited articles, Citation analysis, Altmetric scores.

## Strengths and Limitations of the study

- Four searches were conducted in the web of Science database and the altmetric tracks.
- The analysis explored a range of bibliometric parameters.
- The study was limited to top-cited articles in the English language.

## Introduction

Citation counts have been used by universities and funding bodies to measure scientific outcomes, make decisions about professional promotion, and assess suitability for grant applications [1,2]. In this context, it was claimed that the higher the number of citations received, the higher the quality of work and the more likely that other researchers cite the work [3]. While these claims may not necessarily be true, there is a substantial body of evidence that the number of citations correlates with other research achievements including research awards, honors, nomination for Nobel laureateship [3,4], prestigious research positions [5], and academic ranking [6,7]. However, there are factors other than scientific quality, that may affect the decision to cite [8]. For example, there is evidence that early interest in a research publication reflected by online access within a week of publication predicts citations up to 15 years later [9]. Also, scientific citations favor positive results and authors tend to cite primarily works by authors with whom they know and personally acquainted [10,11].

With these limitations in mind, there is a continuous search for alternatives or meters that can complement the citation counts. Currently, there is a rising interest in the altmetric scores. Contrary to traditional citation-based analysis, the altmetrics reflect the widespread attention to published scientific articles and the rise of social media for dissemination and discussion

1  
2  
3 of scientific information. Therefore, it is possible to quantify discussion of an article on  
4  
5 blogs, news media or other social media platforms [12].  
6  
7

8  
9 Considering these two tools, it was decided to assess highly-cited articles on medical  
10  
11 professionalism [13,14]. The top-cited articles were selected because an earlier study  
12  
13 revealed a number of attributes of articles on medical professionalism [14]. The use of the  
14  
15 altmetric scores in this study in particular is thought to be useful since articles on  
16  
17 professionalism are usually shared on social media.  
18  
19

20  
21 Therefore, the present study aims at the following: First, identify the most cited articles in  
22  
23 medical professionalism and evaluate their characteristics, and study any correlations  
24  
25 between the number of citations and each of their bibliometric characteristics. Second, assess  
26  
27 the impact of such articles on social media by calculating the altmetric scores and conducting  
28  
29 an exploratory analysis examining the altmetric findings compared to citation analysis. The  
30  
31 conduction of multivariate analysis model may provide additional insight into such  
32  
33 evaluation. The findings from this study may enable researchers to identify common features  
34  
35 of articles behind the progress of medical professionalism and key topics discussed over the  
36  
37 last two-three decades. The study may provide more insight into any relationships between  
38  
39 citation analysis and the altmetric scores. The identified list of publications may be useful to  
40  
41 medical educators and those teaching medical professionalism or doing masters or research in  
42  
43 these areas.  
44  
45  
46  
47  
48

## 49 **Methods**

### 50 **Study Design**

51  
52 To achieve the objectives of this study, it was decided to search the Web of Science database  
53  
54 of Clarivate Analytics for highly cited articles and track the citation records of publications  
55  
56 identified. Although Scopus and Google Scholar databases also provide citation tracking, it  
57  
58  
59  
60

1  
2  
3 was decided to limit the search to the Web of Science. This is because the Web of Science is  
4 regularly updated and its 2016-Journal Citation Reports (JCRs) reported over 59 million  
5 citations in its Science Edition and 7 million from its Social Science Edition. In the area of  
6 medical education, medical ethics and bioethics, general medicine, and surgery, the Web of  
7 Science has included 16, 49, 457 and 180 peer-reviewed journals, respectively. Google  
8 Scholar was not included in the search because it is difficult to search, and it is not possible to  
9 identify the number of citations for each year across the last two-three decades, and the  
10 citations in Google Scholar usually include textbooks, monographs, conference proceedings,  
11 as well as non-peer-reviewed work. The Scopus database was not included in our search  
12 because its records only go back to 1966.

13  
14 To achieve the first aim, we planned to identify the highly cited articles in medical  
15 professionalism and their characteristics using three mechanisms: (1) Searching the Web of  
16 Science using keywords, (2) Searching medical education, ethics, general medicine and  
17 surgery journals in the Web of Science, (3) Searching the webpage of journals, and (4)  
18 searching for related resources mentioned in the list of references of articles identified. For  
19 the second aim, the altmetric bookmarklet application was used to obtain the altmetric scores  
20 and construct exploratory analysis examining the role of social media and the different  
21 resources contributing to altmetrics. At the end, we compared these findings with those  
22 obtained from the citation analysis [15,16,17]. A description of the steps used in the search  
23 are discussed below.

### 24 25 26 27 28 29 30 31 32 33 34 35 36 37 38 39 40 41 42 43 44 45 46 47 48 49 50 51 **Searching the Web of Science Database using keywords**

52 Searching the Web of Science database was carried out in the 5<sup>th</sup> of April 2017 by two  
53 researchers (SAA is a professor of medical education with a 20 year-experience in research in  
54 the field of medical education and professionalism, and SA a medical registrar and  
55 researcher). The search words used were the following: “Medical professionalism”, “Patient  
56  
57  
58  
59  
60

1  
2  
3 safety”, “Professional behavior”, “Unprofessional behavior”, “Role modeling”,  
4  
5 “Accountability”, “Faculty training in professionalism”, “Altruism”, “Physician code”,  
6  
7 “Physician charter”, “Medical ethics”, “Integrity”, “Consent”, “Defining medical  
8  
9 professionalism”, “Empathy”, “Compassionate doctor”, “Professional conduct”,  
10  
11 “Collaborative doctor”, “Self-assessment”, “Professional development”, “Resilient doctor”,  
12  
13 “Social justice”, “Patient autonomy”, “Patient Welfare”, “Professional responsibility”,  
14  
15 “Managing conflict”, “Patient confidentiality”, “Quality of care”, “Social contract”, “Team  
16  
17 work and professionalism”, “Personal development”, “Public professionalism”,  
18  
19 “Interpersonal professionalism”, and “Intrapersonal professionalism”. These keywords were  
20  
21 identified from the terminology and themes used in defining medical professionalism in six  
22  
23 resources including [18-23]. We also looked at conference proceedings in the field and  
24  
25 websites of organizations and agencies responsible for accreditation of medical education  
26  
27 worldwide including: *The World Federation for Medical Education (WFME)*, *the UK’s*  
28  
29 *General Medical Council (GMC)*, *the Association of American Medical Colleges (AAMC)*,  
30  
31 *the Australian Medical Council (AMC)*, *the Liaison Committee on Medical Education*  
32  
33 *(LCME)*, *and the Quality Assurance of Basic Medical Education (QABME)*, *and documents*  
34  
35 *such as: Tomorrow’s doctors, 2003; The New Doctor, 2004; and General Medical Practice,*  
36  
37 *2001.*

38  
39  
40  
41  
42  
43  
44  
45 For each search word, the results were arranged using a link on the Web of Science database  
46  
47 system “sort-by” – “Time Cited- highest to lowest”. The results showed the articles  
48  
49 organized in a descending order with the articles most frequently cited on the top. The  
50  
51 findings from each search word were then arranged on one Excel sheet in a descending order  
52  
53 based on the number of citations. The results identified by each evaluator were discussed and  
54  
55 duplicate articles were excluded.  
56  
57  
58  
59  
60



## Searching journals in the Web of Science

The second search involved searching all journals in the field of medical education, ethics, general medicine and surgery included in the Web of Science database. These journals are known to publish articles on medical professionalism. They were selected on the basis of the outcomes of the Web of Science search and the references cited by the articles identified. The aims of this second search was to maximize the yield of the search and detect any articles that were possibly missed during the first search. This search was conducted under the same conditions of the first search, by the two researchers, on the same day, and by using the same keywords used in the first search. The journals in medical education that were searched included *Academic Medicine, Medical Education, Medical Teacher, BMC Medical Education, Advances in Health Sciences Education Theory, and Practices, Teaching and Learning in Medicine, and the Journal of Continuing Education in the Health Professions*. The journals searched in general medicine and surgery were *the New England Journal of Medicine, the Lancet, the British Medical Journal, the Journal of the American Medical Association, Journal of General Internal Medicine, Annals of Internal Medicine, Archives of Internal Medicine, Canadian Medical Association Journal, PLOS Medicine, Annals of Surgery, Archives of Surgery, British Journal of Surgery, Perspectives in Biology and Medicine, Mayo Clinic Proceedings, and the Australian Medical Journal*. The journals in bioethics that were searched included *the American Journal of Bioethics, Journal of Medical Ethics, and BMC Medical Ethics*. The findings from journals were then arranged on one Excel sheet in a descending order based on the number of citations. The results identified by each evaluator were discussed and duplicate articles were excluded.

## Searching the webpage of journals

To maximise the yield of our search and to ensure that no paper was missed through searching the Web of Science, we conducted a third search using the webpage of the journals

1  
2  
3 mentioned above. We examined the titles of articles listed in each issue of these journals  
4  
5 during 2011 and prior years. This search was particularly important as for example, *Teaching*  
6  
7 *and Learning in Medicine* first appeared in Web of Science in 1996 but the journal was  
8  
9 published since 1989. Therefore, any relevant articles from this journal or others prior to  
10  
11 1996 would be included.  
12  
13

### 16 **Inclusion and Exclusion Criteria**

17 The inclusion criteria were: (i) papers focusing on medical professionalism in the English  
18  
19 language, and (ii) articles, reviews, research papers, reports, editorials on any aspect related  
20  
21 to medical professionalism in the English language. The exclusion criteria were: (i) articles  
22  
23 on medical professionalism in languages other than English, and (ii) articles that focused on  
24  
25 education/curriculum or clinical practices and medical professionalism was not the main  
26  
27 focus. Articles with identical absolute number of citations were ranked on the basis of the  
28  
29 average citation per year (the number of citations obtained divided by the number of years  
30  
31 since published) [24]. A copy of all papers included in the list was obtained and read by the  
32  
33 evaluators.  
34  
35  
36  
37  
38

39 It is interesting to note that none of the articles excluded on the basis of language were  
40  
41 qualified for inclusion in the list because they had less citation numbers than those of the  
42  
43 article marked number 50 in the list.  
44  
45  
46  
47  
48

### 49 **Assessing the Articles**

51 For each of the identified articles (Appendix 1), a full text was obtained and a copy was given  
52  
53 to each researcher. The following information was collected: (i) the authors' names and their  
54  
55 affiliations, and the number of females contributing to authorship (ii) the number of institutes  
56  
57 involved and the city and country of the origin of the publication, (iii) the total number of  
58  
59  
60

1  
2  
3 citations obtained up to the day of searching the database, and the number of yearly citations  
4 since publication, (iv) the year of publication and the calculated number of years since  
5 publication, and (v) grants/funding bodies stated in the publication and (vi) the 2016-JIF of  
6 the journal that published the work.  
7  
8  
9  
10  
11

12  
13 We also aimed at grouping the identified top-cited articles into categories. We have not used  
14 the categories provided by the Web of Science “study type” because we noted that the Web  
15 of Science system does not differentiate between “original research” or “articles” and  
16 classified both as “articles”. For consistency and the purpose of this study, we grouped the  
17 articles into four categories - article, review, editorial material, and research. A definition of  
18 each category is given in the glossary. Using these definitions, two researchers  
19 independently allocated each article under a category. For articles that were difficult to  
20 classify or not fitting into the same category, a meeting was held to discuss these articles and  
21 a final decision was made.  
22  
23  
24  
25  
26  
27  
28  
29  
30  
31  
32  
33

34 The topics covered in identified articles were created by each researcher independently by  
35 generating key words reflecting the main idea covered in an article and using these words to  
36 phrase a short statement that could help in grouping more than one article under one topic.  
37 The topics were then discussed in a meeting to harmonize the grouping into a logical, simple  
38 and practical approach. Articles covering more than one topic were classified on the basis of  
39 the aim of the study, the title and the main outcomes.  
40  
41  
42  
43  
44  
45  
46  
47  
48  
49

### 50 **Identification of author's gender**

51 Regarding the data collected for each article, it is important to mention here that the  
52 identification of the gender of each author was a challenging task particularly when a journal  
53 uses abbreviations of the first and second name rather than the full name, which was the case  
54 in three articles. The approach used in order to identify the females in the top-cited articles  
55  
56  
57  
58  
59  
60

1  
2  
3 included (1) searching the Google database to find the university website, personal website of  
4 the author, LinkedIn webpage, and ResearchGate account. This approach was particularly  
5 useful for authors who could have moved to other universities, (2) searching the university  
6 websites not only provided the full names but also provided identification photos of these  
7 authors, and in many times a list of their publication records, as well as areas of  
8 research/teaching interests (3) Searching the Google Scholar database to identify their  
9 accounts, where we can find other publications under their names, the full name or an  
10 identification photo showing them. Usually authors of highly-cited articles have other  
11 publications related to the same topic, or work with the same co-authors, which could also  
12 help in identifying them and tracing them, and (4) In two difficult cases we emailed the  
13 corresponding author of these articles for help.

### 30 **Altmetric system**

31 The altmetric system comprises, but not limited to, policy documents, news, blogs, tweeters,  
32 online reference managers (e.g., Mendeley, CitULike), post-publication peer reviews (e.g.,  
33 Publons), Social media platforms (e.g., Facebook, Google+, Pinterest), citations on  
34 Wikipedia, sites running Stack Exchanges (Q&A), and reviews on Faculty 1000 (F1000) and  
35 YouTube. Therefore, altmetric scores may reflect interest of the public as well as clinicians  
36 and researchers in a publication and the scores may provide information about the  
37 geographical and demographic details of those involved in such online/social media  
38 discussions [25].

39  
40  
41  
42  
43  
44  
45  
46  
47  
48  
49  
50 The altmetric program process raw data collected from the above-mentioned resources and  
51 the data is weighted according to a system created by altmetrics to reflect the relative  
52 contribution of each source to the total altmetric score. News, Blogs, Wikipedia, policy  
53 documents have a relatively higher weighting values [26]. While Mendeley, and CiteULike  
54 are shown in the report, they do not contribute to the total score.

## Searching the altmetric system

The search of the altmetric system was conducted on the same day (the 5<sup>th</sup> of April 2017).

The scores were identified using the Altmetric bookmarklet provided by the company [27]. In summary, the articles were searched on PubMed database (the PMID or DOI are essential for triggering the altmetric bookmarklet to function). By clicking on the LinkOut link, we identified the publisher webpage hosting the original article and by clicking the altmetric bookmarklet application, we can check the attention records for the article. The altmetric attention score and donut help in identifying the relative quantity and the type of attention received by a published article. The meaning of the colours included in altmetric donut is explained in this link [28].

## Statistical Analysis

All analyses were conducted using SPSS Software (IBM SPSS Statistics Premium version 22.0 for Mac OS-SPSS Inc., Chicago, IL, USA) and the results were reported at total, mean, median, IQR, and percentage. Pearson's correlation coefficient ( $r$ ) was calculated to determine if the high citation numbers obtained were related to parameters characteristic of articles. Because of the observed differences in the citations of the top articles in the list compared to those in the bottom of the list, and the variability in the altmetric scores, it was decided to conduct a multivariate analysis model comprising the effect of number of authors, and other parameters. The inter-rater agreement between evaluators was calculated using the Fleiss kappa scale [29].

## Patient and Public Involvement

Patients and the public were not involved in this study

## Results

## Top-Cited Papers Identified

Appendix 1 summarizes the 50 most cited articles in medical professionalism identified by searching the Web of Science database [30-79], out of a total of 3500 articles identified on professionalism. The articles are listed in a descending order from 1 to 50 with the highest absolute citation number is ranked 1 and the article with the lowest citation ranked 50 as per the day of the search. Articles with the same number of citations were ranked on the basis of average citation per year. (e.g., the articles ranked 34 and 35 had the same citation number 97, they were allocated to a ranking order based on the calculated citation per year, 13.86 and 7.46, respectively). Other articles that had the same citation number and were ranked on the basis of their calculated citation per year were articles ranked 36 and 37; 43 and 44; as well as 46 and 47.

Table 1 summarizes the year of publication and article category. The articles were published over 17 years (from 1994 to 2011). During the period from 1994 to 1999, only 7 articles (14%) were published. However, the number increased significantly from 2000 to 2005 making a total of 24 (48%) articles. The number in the years from 2006 to 2011 dropped to 19 (38%). No correlation was found between the citation counts of these papers and the number of years since publication (Pearson correlation ( $r$ ) = 0.188,  $p$  = 0.192).

Table 1. The most cited papers in medical professionalism, summarized by year of publication and category

| Article category | Year of publication: no of articles [Reference] |              |                        |                                    |              |           |           |
|------------------|-------------------------------------------------|--------------|------------------------|------------------------------------|--------------|-----------|-----------|
|                  | 1994-1996                                       | 1997-1999    | 2000-2002              | 2003-2005                          | 2006-2008    | 2009-2011 | Total (%) |
| Article          |                                                 | 2<br>[59,74] | 4<br>[35,46,<br>60,67] | 8<br>[40,47,49,51,<br>53,61,76,64] | 3 [33,65,68] | 2 [69,75] | 19 (38%)  |

|                    |        |              |              |                    |                           |                              |           |
|--------------------|--------|--------------|--------------|--------------------|---------------------------|------------------------------|-----------|
| Review             | 1 [78] | 2<br>[32,50] | 2<br>[30,36] | 4<br>[55,56,62,70] |                           | 2 [38,52]                    | 11 (22%)  |
| Editorial material |        | 1 [44]       | 1 [57]       | 1 [31]             | 1 [58]                    |                              | 4 (08%)   |
| Research           |        | 1 [42]       |              | 4<br>[34,37,66,73] | 5<br>[43,45,48,5<br>4,71] | 6<br>[39,41,63,72<br>,77,79] | 16 (32%)  |
| Total (%)          | 1 (2%) | 6 (12%)      | 7 (14%)      | 17 (34%)           | 9 (18%)                   | 10 (20%)                     | 50 (100%) |

The distribution of the medical professionalism topics covered in these articles is summarized in Table 2. The inter-rater agreement between assessors was in the range 0.758 to 0.846

Table 2 The most cited articles in medical professionalism summarized by category and topic

| Topics in medical professionalism                              | Category: number of articles [References] |              |                    |              |           |
|----------------------------------------------------------------|-------------------------------------------|--------------|--------------------|--------------|-----------|
|                                                                | Articles                                  | Review       | Editorial material | Research     | Total (%) |
| Defining and measuring medical professionalism                 | 2 [35,47]                                 | 3 [30,56,62] |                    |              | 5 (10%)   |
| Role modeling, mentoring, and professional clinical practice   | 1 [40]                                    | 2 [32,78]    |                    |              | 3 (6%)    |
| Physician charter and professionalism                          |                                           |              | 1 [31]             |              | 1 (2%)    |
| Response to conflict, social responses, and social environment | 3 [33,46,61]                              | 1 [55]       |                    |              | 4 (8%)    |
| Professional and unprofessional behavior/disciplinary actions  | 3 [75,68,74]                              | 1 [36]       |                    | 3 [34,71,37] | 7(14%)    |
| Empathy and moral development                                  |                                           | 1 [38]       |                    | 3 [45,48,73] | 4 (8%)    |
| Professional conduct of medical students                       |                                           |              |                    | 2 [41,63]    | 2 (4%)    |

|                                                         |                       |          |           |              |           |
|---------------------------------------------------------|-----------------------|----------|-----------|--------------|-----------|
| Learning/teaching professionalism and curriculum issues | 5 [49,59,60,65,69,76] | 1 [50]   | 1 [58]    | 1 [42]       | 8 (16%)   |
| Online social networking and professionalism            | 1 [69]                |          |           | 3 [43,39,72] | 4 (8%)    |
| Quality improvement and evidence-based practices        | 1 [51]                | 1 [52]   |           | 2 [54,79]    | 4 (8%)    |
| Self-assessment                                         | 1 [53]                |          |           | 1 [77]       | 2 (4%)    |
| Public roles and medical professionalism                | 1 [64]                |          | 2 [44,57] |              | 3 (6%)    |
| Faculty development in medical professionalism          |                       |          |           | 1 [66]       | 1 (2%)    |
| Medical ethics and end of life care                     | 1 [67]                | 1 [70]   |           |              | 2 (4%)    |
| Total                                                   | 19 (38%)              | 11 (22%) | 4 (8%)    | 16 (32%)     | 50 (100%) |

The articles were published in the following journals: *Academic Medicine* (n=19, 38%), *the Journal of the American Medical Association* (n=9, 18%), *Journal of General Internal Medicine* (n=4, 8%), *Annals of Internal Medicine* (n=4, 8%), *the New England Journal of Medicine* (n=3, 6%), and *Medical Education* (n=3, 6%). It is interesting to note that 24 (48%) articles were published in eight general medicine journal and the remaining were published in four medical education journals and one journal specialized in bioethics. Most journals have high journal impact factors and are on the top of their field (Table 3). This finding reflects the significance of medical professionalism in undergraduate and postgraduate training. The first author of the top-cited articles was from the United States (n= 37, 74%), Canada (n= 8, 16%), the United Kingdom (n=2, 4%), Germany (n= 1, 2%), Israel (n=1, 2%), and New Zealand (n= 1, 2%).

Table 3. The journals that published the top-cited articles in medical professionalism, and the journal impact factor.

| Journal | 2016-Journal Impact Factor | Number of papers published [References] |
|---------|----------------------------|-----------------------------------------|
|         |                            |                                         |



|                                                                   |        |                                                               |
|-------------------------------------------------------------------|--------|---------------------------------------------------------------|
| <i>Journal of the American Medical Association</i>                | 44.405 | 9 [30,32,33,39,41,42,64,67,75]                                |
| <i>New England Journal of Medicine</i>                            | 72.406 | 3 [34,44,57]                                                  |
| <i>Academic Medicine</i>                                          | 5.255  | 19 [35,36,37,38,40,45,46,47,50,52,56,59,60,63,65,68,70,74,77] |
| <i>Journal of General Internal Medicine</i>                       | 3.701  | 4 [43,48,61,69]                                               |
| <i>Medical Education</i>                                          | 4.005  | 3 [49,66,72]                                                  |
| <i>Health Affairs</i>                                             | 4.980  | 1 [51]                                                        |
| <i>Advances in Health Sciences Education Theory and Practices</i> | 1.852  | 1 [53]                                                        |
| <i>Annals of Internal Medicine</i>                                | 17.135 | 4 [31,54,71,78]                                               |
| <i>British Medical Journal</i>                                    | 20.785 | 1 [55]                                                        |
| <i>Medical Teacher</i>                                            | 2.502  | 2 [58,62]                                                     |
| <i>Canadian Medical Association Journal</i>                       | 6.784  | 1 [73]                                                        |
| <i>American Journal of Bioethics</i>                              | 6.434  | 1 [76]                                                        |
| <i>Archives of Internal Medicine</i>                              | 17.333 | 1 [79]                                                        |

Table 4 summarizes the 26 authors who have contributed to two or more articles in the list. Of these, five authors were the first authors of two or more papers, ten were coauthors of two or more papers, and the remaining eleven were the first authors and coauthors of two or more articles. Top authors were Papadakis, M (n=4; first author of all four papers), and Blank, L (n=4; first author of one paper and coauthor of three). Other top authors are shown in Table 4.

Table 4. Authors and co-authors of two or more articles

| Author's name | Number [Reference] |          | Author's name | Number [Reference] |          |
|---------------|--------------------|----------|---------------|--------------------|----------|
|               | First author       | Coauthor |               | First author       | Coauthor |
| Epstein, RM   | 2 [30,32]          | -        | Greysen, SR   | 1 [69]             | 1 [39]   |

|               |                 |              |               |           |           |
|---------------|-----------------|--------------|---------------|-----------|-----------|
| Blank, L      | 1 [31]          | 3 [33,56,71] | Kind,T        | -         | 2 [39,69] |
| Kimball, H    | -               | 2 [31,33]    | Mann, KV      | -         | 2 [40,77] |
| Brennan,TA    | 1 [33]          | 1 [64]       | Dyrbye, LN    | 1 [41]    | 1 [48]    |
| Rothman, DJ   | 1 [57]          | 1 [33]       | Thomas,MR     | 1 [48]    | 1 [41]    |
| Blumenthal, D | -               | 2 [33,54]    | Sloan, J      | -         | 2 [41,48] |
| Papadakis, MA | 4 [34,37,71,74] | -            | Shanafelt, TD | -         | 2 [41,48] |
| Teherani, A   | -               | 2 [34,37]    | Holmboe, ES   | -         | 2 [71,77] |
| Veloski,JJ    | 1 [56]          | 1 [34]       | Coulehan, J   | 2 [46,47] | -         |
| Hodgson, CS   | -               | 2 [34,37]    | Cruess, RL    | 2 [50,58] | 1 [66]    |
| Swick, HM     | 2 [35,42]       | -            | Eva, KW       | 1 [53]    | 1 [77]    |
| Kretien, KC   | 1 [39]          | 1 [69]       | Wear, D       | 2 [60,76] | -         |
| Levinson,W    | -               | 2 [52,75]    |               |           |           |
| Gruen, RL     | 1 [64]          | 1 [54]       |               |           |           |

The leadership of universities and institutes that have contributed to the creation of these publications are shown in appendix 1.

### Characteristics of the Top-Cited Articles

These articles were created by 252 authors, median 4, minimum 1, maximum 19, IQR 4, and the females in authorship were 102, median 2, minimum 0, maximum 11, IQR 2. The institutes involved were 168, median 2, minimum 1, maximum 17, IQR 3; the countries involved were 67, median 1, minimum 1, maximum 9, IQR 0; and the grants/funds received were 35, median 0, minimum 0, maximum 8, IQR 1. Significant correlations were found between the number of citations and the 2016-JIF (Pearson correlation ( $r$ ) = 0.318;  $p=0.024$ ), and the number of countries ( $r=0.453$ ;  $p=0.001$ ). No significant correlations were found between the number of citations and the number of years since publication ( $r=0.188$ ,  $p=0.192$ ), the number of authors ( $r=0.159$ ;  $p=0.270$ ), number of females in authorship ( $r=0.343$ ;  $p=0.150$ ), the number of institutes involved ( $r=0.249$ ;  $p=0.081$ ), or the number of grants received ( $r=-0.126$ ;  $p=0.384$ ).

## The altmetric scores

The altmetric scores and reports were found for 70% of articles. The total scores were 806, median 5, minimum 0.0, maximum 155, IQR 20. No correlation was found between the number of citations and the total altmetric scores ( $r=0.064$ ;  $p=0.661$ ). A significant correlation was found between number of citations and altmetric scores for articles published in 2007 and after ( $n=17$ ,  $r=0.547$ ,  $p=0.023$ ). No correlation was found for articles published in 2006 or earlier. Only 38% of the articles had readers on CiteULike (mean 1.6, 95% CI 0.4-2.7, median 0, minimum 0, maximum 19, IQR 1; while 62% were read Mendeley (mean 72.7, 95% CI 45.2-100.3, median 39.5, minimum 0, maximum 499, IQR 120). The coverage of journal articles by Twitter was 54% (mean 7.8, 95% CI 2.7-13.0, median 1.5, minimum 0, maximum 117, IQR 10) followed by blogs 38% (mean 1.2, 95% CI 0.6-1.8, median 0, minimum 0, maximum 7, IQR 1), then policy sources 24% (mean 0.38, 95% CI 0.15-0.61, median 0.0, minimum 0.0, maximum 3, IQR 0), then Facebook 20% (mean 0.3, 95% CI 0.07-0.61, median 0, minimum 0, maximum 6, IQR 0). The Wikipedia was the lowest resource. No significant correlation was found between the number of citations and altmetric scores ( $r=0.064$ ;  $p=0.661$ ). The geographic breakdown showed that United States had the highest share, followed by United Kingdom. Other countries identified for some articles were Canada, Mexico, Spain, Australia, Spain, Chile, Netherlands, Portugal, Japan, Columbia, Italy, France and Brazil. We looked at journals' webpages of the top-cited articles and those hosting the altmetric meter; we did not find significant correlation between hosting the altmetric meter and recorded altmetric scores.

## Multivariate analysis

Because of the observed differences in the citations of the top articles in the list compared with those in the bottom of the list, and the variability in the altmetric scores, it was decided to conduct a multivariate analysis comprising the effect of number of authors, number of

institutes, number of countries, number of females in authorship, number of grants obtained on the citation scores and altmetric scores (Table 5).

Table 5 Assessing the impact of publication variables on citation scores and altmetric scores using multivariate analysis

| Category (n)                   | Citation scores |             | Altmetric scores |             | p-value |
|--------------------------------|-----------------|-------------|------------------|-------------|---------|
|                                | Mean±SD         | 95% CI      | Mean±SD          | 95% CI      |         |
| Authors: 4 or more (6)         | 228.5±186.4     | 86.5-370.5  | 2.5±4.8          | -41.2-46.2* | 0.762   |
| Authors: 2-3 (16)              | 161.7±211.2     | 74.7-248.6  | 9.9±16.3         | 16.8-36.6   | 0.802   |
| One author (28)                | 166.5±144.3     | 100.8-232.3 | 33.6±69.1        | 13.4-53.9   | 0.803   |
| Institutes: 3 or more (18)     | 200.3±219.2     | 118.7-281.9 | 6.0±7.4          | 19.3-31.3   | 0.563   |
| Two institutes (12)            | 131.2±46.6      | 31.2-231.1  | 34.2±97.6        | 3.2-65.2    | 0.272   |
| One institute (20)             | 172.0±170.4     | 94.6-249.5  | 29.8±38.5        | 5.8-53.8    | 0.541   |
| Countries: 2 or more (40)      | 169.8±158.9     | 115.1-224.6 | 21.8±55.7        | 4.6-39.1    | 0.411   |
| One country (10)               | 182.7±221.0     | 73.1-292.3  | 24.1±47.3        | 10.4-58.6   | 0.808   |
| Female authors: 2 or more (10) | 263.6±281.9     | 157.1-370.1 | 6.4±8.0          | -27.6-40.4  | 0.151   |
| One female author (14)         | 166.8±187.7     | 76.8-256.8  | 12.4±20.6        | -16.4-41.1* | 0.286   |
| No female author (26)          | 140.4±75.6      | 74.3-206.4  | 33.8±71.5        | 12.7-54.8*  | 0.334   |
| Grants: 2 or more (30)         | 197.5±213.1     | 134.6-260.4 | 10.7±16.4        | 8.4-29.9    | 0.451   |
| One grant (15)                 | 36.7±60.4       | 47.7-225.7  | 34.7±86.9        | 7.4-61.9    | 0.132   |
| No grants (5)                  | 128.8±53.7      | 25.3-282.9  | 55.0-63.3        | 7.7-102.3   | 0.394   |

None of the categories studied caused significant differences on the citation scores or the altmetric scores.

\*The analysis involved subgroups, smaller sample size, and because the smaller altmetric scores for these subgroups, the CI was negative.

## Discussion

The aims of this study were to identify the highly-cited papers in medical professionalism and compare their characteristics and citation analysis with the altmetric scores. Currently

1  
2  
3 there is a great interest to examine if there is a relationship between altmetric indicators and  
4 citation counts. The question remains can we measure the impact of scientific publications by  
5 measuring their social density effects?  
6  
7  
8  
9

10 The study has identified key topics related to medical professionalism including:

11 Learning/teaching professionalism and curriculum issues, Professional and unprofessional  
12 behaviour/disciplinary actions, Defining and measuring medical professionalism, Response  
13 to conflict, social responses, and social environment, Empathy and moral development,  
14 Online social networking and professionalism, Quality improvement and evidence-based  
15 practices, Role modeling, mentoring and professional clinical practice, and Public roles and  
16 medical professionalism. While these topics highlight major issues related to medical  
17 professionals, topics related to transition of first-year students from being laypersons to being  
18 members of the medical profession, how medical schools change assessment to focus much  
19 more on a student's attitudes and personal development as a professional, not just on his or  
20 her knowledge of medicine, as well as strategies to introduce new teaching/learning  
21 approaches that facilitate the integration of medical professionalism across the years in the  
22 medical curriculum and demonstration of professional behavior in day-to-day practices may  
23 be lacking [80].  
24  
25  
26  
27  
28  
29  
30  
31  
32  
33  
34  
35  
36  
37  
38  
39  
40  
41  
42

43 The study revealed the characteristics of the 50 most cited articles; the following points are  
44 worth discussion:  
45  
46

47 First, the study demonstrated that there is no significant correlation between the citation  
48 counts and the number of authors, or the number of female authors. The number of authors  
49 and females in authorship varied from one to 19 and from zero to 11, respectively. The two  
50 questions that can be raised in this regard; are we expecting an increase in number of  
51 citations as the number of authors increases? And is the gender of authors a factor affecting  
52 citation counts? Several studies indicated that the number of authors or the gender of authors  
53  
54  
55  
56  
57  
58  
59  
60

1  
2  
3 are not among the factors affecting the citation received by a publication; factors such as  
4  
5 having a higher level of evidence may be more likely to affect citation counts [81].  
6  
7

8  
9 Although the proportion of women in authorship of original research in the United States in  
10  
11 general has significantly increased in the last four decades and more women are enrolling  
12  
13 Master's and PhD degrees [82], women still compose a minority of the authors of original  
14  
15 research and there are some differences by subfield [83,84]. Recently, an increased  
16  
17 satisfaction about the proportion of women faculty, especially full professors in academic  
18  
19 medicine, has been reported, suggesting an improvement in the balance at least in this  
20  
21 subfield [85].  
22  
23  
24

25  
26 Second, the study showed significant correlation between the citation counts and the number  
27  
28 of countries involved, but not the number of institutes. However, further analysis using  
29  
30 multivariate analysis model did not show significant relationships at different subgroups.  
31  
32 While Figg et al [86] reported that there is a correlation between the number of authors and  
33  
34 the number of times an article is cited by other researchers, the work of Garcia-Aroca et al  
35  
36 [87] showed that publishing in English in certain journals and collaborating with certain  
37  
38 authors and institutes increase the visibility of the manuscripts published on the subject.  
39  
40 Therefore, it is the quality of collaboration rather than the absolute number of these  
41  
42 parameters. Recently Tanner-Smith and Polanin showed that studies conducted by more  
43  
44 established authors (have higher *h-indices*) and reported in more prestigious journal outlets  
45  
46 are more likely to be cited by other scholars, even after controlling for various proxies of  
47  
48 study quality [88].  
49  
50  
51  
52  
53

54  
55 Third, the study showed no significant correlation between the number of citations and the  
56  
57 number of grants received. This finding is not surprising. Recently it was shown that too  
58  
59 many of the United States authors of most influential papers in science do not receive NH  
60

1  
2  
3 funding [89]. Another group of researchers found no association between grant percentile  
4 ranking and grant outcome as assessed by number of top-10% articles per dollar million spent  
5 [90]. Interestingly, the work of Gok et al [91] showed that funding on its own is not a  
6  
7  
8 measure of citation impact but is principally related to funding variety and negatively related  
9  
10  
11  
12 with funding intensity. Also, there was an inverse relationship between the relative frequency  
13  
14  
15 of funding and citation impact.  
16

17  
18 Fourth, the lack of significant correlation between the number of citations and the number of  
19  
20  
21 years since publication may indicate that the higher citations are not due to ageing of articles  
22  
23  
24 but possibly due to the new knowledge discussed and the evidence presented by authors to  
25  
26  
27 answer challenging questions. In fact, the majority of these articles (36, 72%) were published  
28  
29  
30 in 2003 to 2011 and the oldest article in the list was published in 1994.

31  
32 The United States, Canada and the United Kingdom contributed most to these articles. The  
33  
34 leadership of universities from these countries in medical professionalism is no surprise.

35  
36 Altmetrics have a number of functions including: First, a record of the degree to which  
37  
38 people, public and academics/clinicians, engaged with a scholarly publication. Second, a  
39  
40  
41 measure of the dissemination of a scholarly work including the geographic and demographic  
42  
43  
44 details of those involved in such discussions on social media channels. Third, possibly an  
45  
46  
47 indirect measure of influence and impact of scholarly work.

48  
49 The idea of “altmetrics” or social web metrics was first proposed by Priem and Hemminger  
50  
51  
52 [92] and is based on the hypothesis that the analysis of scientific outputs and discussions in  
53  
54  
55 social media tools can be used as an alternative to citation bibliometrics created by Garfield  
56  
57  
58 [93]. The hypothesis may bring new insight into the understanding of scientific impact and  
59  
60  
61 the type of relationship between alternative metrics and citation scores. However, currently  
62  
63  
64 there is evidence that the use of social media in promoting and discussing research is low in

1  
2  
3 the research community. It has been reported that 15-25 % of scientific publications have  
4 some altmetric activities and these activities are observed mostly in recent publications in  
5 social sciences, humanities, medical and life sciences [94]. With these limitations in mind, it  
6 is clear that altmetrics open new directions in understanding scientific impact of a publication  
7 not just through peer-review and citation indices, but through assessing other aspects of  
8 impact at society, education, and public domains. While Powell et al found a correlation  
9 between number of citations and altmetric scores for articles published after 2000 [95], we  
10 found significant correlation for articles published in 2007 and after. No correlation was  
11 found for articles published in 2006 or earlier. Our findings and those of Powell et al indicate  
12 the presence of such correlation for articles published after the year 2000.

13  
14  
15  
16  
17  
18  
19  
20  
21  
22  
23  
24  
25  
26  
27 This study has several strengths, First: the search was conducted by two researchers  
28 independently using four approaches with the aim to maximize the outcomes of the search  
29 and not to miss a publication, Second: the study examined the citation numbers, related  
30 bibliometric parameters, and altmetric scores, the relationships between these variables and  
31 their possible effect on citation counts and altmetric scores were evaluated using correlation  
32 studies and multivariate analysis; Third: the study covered top-cited articles on medical  
33 professionalism over the last two decades. However, this study is not without limitations,  
34 First, we limited the search to Web of Science database, and we have not searched other  
35 databases such as Google Scholar or Scopus for reasons mentioned under methods. Also, we  
36 have searched highly cited journals in the area of medical education, ethics, bioethics, general  
37 medicine and surgery to compensate for using one database; and Second, we limited the  
38 study to articles published in the English language. However, further evaluation revealed that  
39 articles published in languages other than English were not qualified for inclusion and their  
40 citation counts were below the article listed number 50.



## Conclusions

Using a multivariate analysis model and correlation studies showed that several bibliometric factors neither correlated with citation scores nor altmetric scores. These variables included, years since publication, the number of authors, the number of female authors, the number of institutes, the number of grants received. The number of females in authorship (40% of total number of authors) highlights the progressive role of females in medical education and the area of medical professionalism. It may be premature to make conclusive remarks about the significance of altmetric scores. However, the finding of correlations between the number of citations and altmetric scores of articles published in 2007 and after provides an additional parameter to the value of altmetric scores.

## Acknowledgement

Authors wish to thank Diana Sanad for her assistance in reviewing the manuscript.

## Funding

This work was funded by the College of Medicine Research Center, Deanship of Scientific Research, King Saud University, Riyadh, Saudi Arabia.

## Declarations

Ethical approval was not needed because the article is based on searching the data base of Web of Science and there were no confidential information or human or animal interventions in the study.

## Conflicts of Interest

None declared.

## Authors' contribution

SAA conceived and designed the study; collected and performed the search of databases, analysis, and interpretation of findings, and drafting the manuscript. SA shared in the search of databases, analysis of findings and critical revision of the manuscript. Both authors approved the manuscript for publication.

## Provenance and Peer Review

Not commissioned; externally peer reviewed.

## Appendix

The content in Appendix 1

## Data Sharing Statement

The data collected are included in the manuscript and appendix 1.

## References

1. Danthi N, Wu CO, Shi P, Lauer M. Percentile ranking and citation impact of a large cohort of national heart, lung, and blood institute-funded cardiovascular R01 grants. *Circ Res*. 2014 Feb 14;114(4):600-606. [doi: 10.1161/CIRCRESAHA.114.302656] [Medline: 24406983]
2. Costello LC. Is NIH funding the “best science by the best scientists”? A critique of the NIH R01 research grant review policies. *Acad Med*. 2010 May;85(5):775-779. [doi: 10.1097/ACM.0b013e3181d74256] [Medline:20520024].
3. Gast KM, Kuzon WM Jr, Waljee JF. Bibliometric indices and academic promotion within plastic surgery. *Plast Reconstr Surg*. 2014 Nov;134(5):838e-844e. [doi: 10.1097/PRS.0000000000000594] [Medline: 25347660]
4. Klosik DF, Bornholdt S. The citation wake of publications detects nobel laureates' papers. *PLoS One*. 2014 Dec 1;9(12):e113184. [doi: 10.1371/journal.pone.0113184] [Medline: 25437855].
5. Choi M, Holliday EB, Jaggi R, Wilson LD, Fuller CD, Thomas CR Jr. Citation-based Estimation of Scholarly Activity Among Domestic Academic Radiation Oncologists: Five-Year Update. *J Radiat Oncol*. 2014 Mar 1;3(1):115-122. [doi: 10.1007/s13566-013-0103-x] [Medline: 24678385].
6. Susarla HK, Dhar V, Karimbux NY, Tinanoff N. Do standard bibliometric measures correlate with academic rank of full-time pediatric dentistry faculty members? *J Dent Educ*. 2017 Apr;81(4):427-432. [doi: 10.21815/JDE.016.006] [Medline: 28365607].
7. Aoun SG, Bendok BR, Rahme RJ, Dacey RG Jr, Batjer HH. Standardizing the evaluation of scientific and academic performance in neurosurgery--critical review of the "h" index and its variants. *World Neurosurg*. 2013 Nov;80(5):e85-90. [doi: 10.1016/j.wneu.2012.01.052] [Medline: 22381859].

- 1
  - 2
  - 3
  - 4
  - 5
  - 6
  - 7
  - 8
  - 9
  - 10
  - 11
  - 12
  - 13
  - 14
  - 15
  - 16
  - 17
  - 18
  - 19
  - 20
  - 21
  - 22
  - 23
  - 24
  - 25
  - 26
  - 27
  - 28
  - 29
  - 30
  - 31
  - 32
  - 33
  - 34
  - 35
  - 36
  - 37
  - 38
  - 39
  - 40
  - 41
  - 42
  - 43
  - 44
  - 45
  - 46
  - 47
  - 48
  - 49
  - 50
  - 51
  - 52
  - 53
  - 54
  - 55
  - 56
  - 57
  - 58
  - 59
  - 60
8. Moustafa K. Aberration of the Citation. *Account Res.* 2016;23(4):230-44. [doi: 10.1080/08989621.2015.1127763] [Medline:26636372].
9. Perneger TV. Online accesses to medical research articles on publication predicted citations up to 15 years later. *J Clin Epidemiol.* 2015 Dec;68(12):1440-5. [doi: 10.1016/j.jclinepi.2015.01.024] [Medline: 25728430].
10. Duyx B, Urlings MJE, Swaen GMH, Bouter LM, Zeegers MP. Scientific Citations Favor Positive Results: A Systematic Review and Meta-analysis. *J Clin Epidemiol.* 2017 Aug;88:92-101. [doi: 10.1016/j.jclinepi.2017.06.002] [Medline: 28603008].
11. Bornmann L, Daniel H-D. What do citation counts measure? A review of studies on citing behavior. *Journal of Documentation* 2008; 64(1):45-80. [doi.org/10.1108/00220410810844150].
12. Kolahi J, Iranmanesh P, Khazaei S. Altmetric analysis of 2015 dental literature: a cross sectional survey. *Br Dent J.* 2017 May 12;222(9):695-699. [doi: 10.1038/sj.bdj.2017.408] [Medline: 28496225].
13. Kirk LM. Professionalism in medicine: definitions and considerations for teaching. *Proc (Bayl Univ Med Cent).* 2007 Jan;20(1):13-16 [Medline: 17256035].
14. Azer SA. Exploring the Top-Cited and Most Influential Articles in Medical Education. *J Contin Educ Health Prof.* 2016 Summer;36 Suppl 1:S32-41. [doi: 10.1097/CEH.0000000000000085] [Medline: 27584067].
15. Azer SA. The top-cited articles in medical education: a bibliometric analysis. *Acad Med.* 2015 Aug;90(8):1147-1161. [doi: 10.1097/ACM.0000000000000780] [Medline: 26061861].
16. Azer SA. Top-Cited Articles in Problem-Based Learning: A Bibliometric Analysis and Quality of Evidence Assessment. *J Dent Educ.* 2017 Apr;81(4):458-478. [doi: 10.21815/JDE.016.011] [Medline: 28365611].
17. Azer SA, Azer S. Bibliometric analysis of the top-cited gastroenterology and hepatology articles. *BMJ Open.* 2016 Feb 8;6(2):e009889. [doi: 10.1136/bmjopen-2015-009889] [Medline: 26857105].
18. Exploring the ACGME Core Competencies: Professionalism (Part 7 of 7). Available at <https://knowledgeplus.nejm.org/blog/acgme-core-competencies-professionalism/> [Last accessed 30 November 2017].
19. ABIM Foundation. American Board of Internal Medicine; ACP-ASIM Foundation. American College of Physicians American Society of Internal Medicine; European Federation of Internal Medicine. Medical

- 1  
2  
3 professionalism in the new millennium: a physician charter. *Ann Intern*  
4 *Med.* 2002 Feb 5;136(3):243-246 [Medline: 11827500].  
5  
6  
7 20. O'Sullivan H, van Mook W, Fewtrell R, Wass V. Integrating professionalism into the  
8 curriculum: AMEE Guide No. 61. *Med Teach.* 2012;34(2):e64-77. [doi:  
9 10.3109/0142159X.2012.655610] [Medline: 22289014].  
10  
11 21. Birden H, Glass N, Wilson I, Harrison M, Usherwood T, Nass D.  
12 Defining professionalism in medical education: a systematic review. *Med Teach.*  
13 2014 Jan;36(1):47-61. [doi: 10.3109/0142159X.2014.850154] [Medline: 24252073].  
14  
15 22. Hafferty FW. Definitions of professionalism: a search for meaning and identity. *Clin*  
16 *Orthop Relat Res.* 2006 Aug;449:193-204. [doi:  
17 10.1097/01.blo.0000229273.20829.d0] [Medline:16770288].  
18  
19 23. Van De Camp K, Vernooij-Dassen MJ, Grol RP, Bottema BJ. How to  
20 conceptualize professionalism: a qualitative study. *Med Teach.* 2004 Dec;26(8):696-  
21 702. [doi: 10.1080/01421590400019518] [Medline:15763872].  
22  
23 24. Tas F. Majority of the most-cited articles on cutaneous malignant melanoma are  
24 published in non-dermatology/melanoma specialized journals. *J Cancer Res*  
25 *Ther.* 2016 Apr-Jun;12(2):612-615. [doi: 10.4103/0973-1482.146094] [Medline:  
26 27461619].  
27  
28 25. Altmetric support. What outputs and sources does altmetric track? Available at  
29 [https://help.altmetric.com/support/solutions/articles/6000060968-what-outputs-](https://help.altmetric.com/support/solutions/articles/6000060968-what-outputs-and-sources-does-altmetric-track-)  
30 [and-sources-does-altmetric-track-](https://help.altmetric.com/support/solutions/articles/6000060968-what-outputs-and-sources-does-altmetric-track-) [Last accessed 30 November 2017].  
31  
32 26. Altmetric support. How is the altmetric attention score calculated? Available at  
33 [https://help.altmetric.com/support/solutions/articles/6000060969-how-is-the-](https://help.altmetric.com/support/solutions/articles/6000060969-how-is-the-altmetric-attention-score-calculated-)  
34 [altmetric-attention-score-calculated-](https://help.altmetric.com/support/solutions/articles/6000060969-how-is-the-altmetric-attention-score-calculated-) [Last accessed 30 November 2017].  
35  
36 27. Altmetric support. Altmetri bookmarklet for researchers. Available at  
37 <https://www.altmetric.com/products/free-tools/bookmarklet/> [Last accessed 30  
38 November 2017].  
39  
40 28. Altmetric. The donut and altmetric attention score. Available at  
41 <https://www.altmetric.com/about-our-data/the-donut-and-score/> [Last accessed 30  
42 November 2017].  
43  
44  
45  
46  
47  
48  
49  
50  
51  
52  
53  
54  
55  
56  
57  
58  
59  
60

- 1  
2  
3  
4  
5  
6  
7  
8  
9  
10  
11  
12  
13  
14  
15  
16  
17  
18  
19  
20  
21  
22  
23  
24  
25  
26  
27  
28  
29  
30  
31  
32  
33  
34  
35  
36  
37  
38  
39  
40  
41  
42  
43  
44  
45  
46  
47  
48  
49  
50  
51  
52  
53  
54  
55  
56  
57  
58  
59  
60
29. Nelson KP, Edwards D. Measures of agreement between many raters for ordinal classifications. *Stat Med*. 2015 Oct 15;34(23):3116-32. [doi: 10.1002/sim.6546] [Medline: 26095449].
  30. Epstein RM, Hundert EM. Defining and assessing professional competence. *JAMA*. 2002 Jan 9;287(2):226-235 [Medline: 11779266].
  31. Blank L, Kimball H, McDonald W, Merino J; ABIM Foundation.; ACP Foundation.; European Federation of Internal Medicine. Medical professionalism in the new millennium: a physician charter 15 months later. *Ann Intern Med*. 2003 May 20;138(10):839-841 [Medline: 12755556].
  32. Epstein RM. Mindful practice. *JAMA*. 1999 Sep 1;282(9):833-839 [Medline: 10478689].
  33. Brennan TA, Rothman DJ, Blank L, Blumenthal D, Chimonas SC, Cohen JJ, Goldman J, Kassirer JP, Kimball H, Naughton J, Smelser N. Health industry practices that create conflicts of interest: a policy proposal for academic medical centers. *JAMA*. 2006 Jan 25;295(4):429-433 [doi: 10.1001/jama.295.4.429] [Medline:16434633].
  34. Papadakis MA, Teherani A, Banach MA, Knettler TR, Rattner SL, Stern DT, Veloski JJ, Hodgson CS. Disciplinary action by medical boards and prior behavior in medical school. *N Engl J Med*. 2005 Dec 22;353(25):2673-2682 [doi: 10.1056/NEJMsa052596] [Medline: 16371633].
  35. Swick HM. Toward a normative definition of medical professionalism. *Acad Med*. 2000 Jun;75(6):612-616 [Medline: 10875505].
  36. Arnold L. Assessing professional behavior: yesterday, today, and tomorrow. *Acad Med*. 2002 Jun;77(6):502-515 [Medline: 12063194].
  37. Papadakis MA, Hodgson CS, Teherani A, Kohatsu ND. Unprofessional behavior in medical school is associated with subsequent disciplinary action by a state medical board. *Acad Med*. 2004 Mar;79(3):244-249 [Medline: 14985199].
  38. Neumann M, Edelhäuser F, Tauschel D, Fischer MR, Wirtz M, Woopen C, Haramati A, Scheffer C. Empathy decline and its reasons: a systematic review of studies with medical students and residents. *Acad Med*. 2011 Aug;86(8):996-1009. [doi: 10.1097/ACM.0b013e318221e615] [Medline: 21670661].

- 1  
2  
3 39. Chretien KC, Greysen SR, Chretien JP, Kind T. Online posting of unprofessional  
4 content by medical students. *JAMA*. 2009 Sep 23;302(12):1309-15. [doi:  
5 10.1001/jama.2009.1387] [Medline: 19773566].  
6  
7  
8 40. Kenny NP, Mann KV, MacLeod H. Role modeling in physicians' professional  
9 formation: reconsidering an essential but untapped educational strategy. *Acad*  
10 *Med*. 2003 Dec;78(12):1203-10 [Medline: 14660418].  
11  
12  
13 41. Dyrbye LN, Massie FS Jr, Eacker A, Harper W, Power D, Durning SJ, Thomas MR,  
14 Moutier C, Satele D, Sloan J, Shanafelt TD. Relationship between burnout and  
15 professional conduct and attitudes among US medical students. *JAMA*. 2010 Sep  
16 15;304(11):1173-80. [doi: 10.1001/jama.2010.1318] [Medline: 20841530].  
17  
18  
19 42. Swick HM, Szenas P, Danoff D, Whitcomb ME. Teaching professionalism in  
20 undergraduate medical education. *JAMA*. 1999 Sep 1;282(9):830-832 [Medline:  
21 10478688].  
22  
23  
24 43. Thompson LA, Dawson K, Ferdig R, Black EW, Boyer J, Coutts J, Black NP. The  
25 intersection of online social networking with medical professionalism. *J Gen Intern*  
26 *Med*. 2008 Jul;23(7):954-957. [doi: 10.1007/s11606-008-0538-8]  
27 [Medline:18612723].  
28  
29  
30 44. Wynia MK, Latham SR, Kao AC, Berg JW, Emanuel LL. Medical professionalism in  
31 society. *N Engl J Med*. 1999 Nov 18;341(21):1612-6. [doi:  
32 10.1056/NEJM199911183412112] [Medline: 10577119].  
33  
34  
35 45. Newton BW, Barber L, Clardy J, Cleveland E, O'Sullivan P. Is there hardening of the  
36 heart during medical school? *Acad Med*. 2008 Mar;83(3):244-249. [doi:  
37 10.1097/ACM.0b013e3181637837] [Medline:18316868]  
38  
39  
40 46. Coulehan J, Williams PC. Vanquishing virtue: the impact of medical education. *Acad*  
41 *Med*. 2001 Jun;76(6):598-605 [Medline: 11401802].  
42  
43  
44 47. Coulehan J. Viewpoint: today's professionalism: engaging the mind but not the heart.  
45 *Acad Med*. 2005 Oct;80(10):892-898 [Medline: 16186604].  
46  
47  
48 48. Thomas MR, Dyrbye LN, Huntington JL, Lawson KL, Novotny PJ, Sloan JA,  
49 Shanafelt TD. How do distress and well-being relate to medical student empathy? A  
50 multicenter study. *J Gen Intern Med*. 2007 Feb;22(2):177-183 [doi: DOI:  
51 10.1007/s11606-006-0039-6] [Medline: 17356983].  
52  
53  
54 49. Hilton SR, Slotnick HB. Proto-professionalism: how professionalisation occurs across  
55 the continuum of medical education. *Med Educ*. 2005 Jan;39(1):58-65. [doi:  
56 10.1111/j.1365-2929.2004.02033.x] [Medline: 15612901].  
57  
58  
59 50. Cruess RL, Cruess SR. Teaching medicine as a profession in the service of healing.  
60 *Acad Med*. 1997 Nov;72(11):941-952 [Medline: 9387815].

- 1  
2  
3 51. Audet AM, Doty MM, Shamasdin J, Schoenbaum SC. Measure, learn, and improve:  
4 physicians' involvement in quality improvement. *Health Aff (Millwood)*. 2005 May-  
5 Jun;24(3):843-853 [doi: 10.1377/hlthaff.24.3.843] [Medline: 15886180].  
6  
7
- 8 52. Wong BM, Etchells EE, Kuper A, Levinson W, Shojania KG. Teaching quality  
9 improvement and patient safety to trainees: a systematic review. *Acad*  
10 *Med*. 2010 Sep;85(9):1425-1439 [doi: 10.1097/ACM.0b013e3181e2d0c6] [Medline:  
11 20543652].  
12  
13
- 14 53. Eva KW, Cunnington JP, Reiter HI, Keane DR, Norman GR. How can I know what I  
15 don't know? Poor self assessment in a well-defined domain. *Adv Health Sci Educ*  
16 *Theory Pract*. 2004;9(3):211-224 [doi: 10.1023/B:AHSE.0000038209.65714.d4]  
17 [Medline: 15316272].  
18  
19
- 20 54. Campbell EG, Regan S, Gruen RL, Ferris TG, Rao SR, Cleary PD, Blumenthal D.  
21 Professionalism in medicine: results of a national survey of physicians. *Ann Intern*  
22 *Med*. 2007 Dec 4;147(11):795-802 [Medline: 18056665].  
23  
24
- 25 55. Littlewood S, Ypinazar V, Margolis SA, Scherpbier A, Spencer J, Dornan T. Early  
26 practical experience and the social responsiveness of clinical education: systematic  
27 review. *BMJ*. 2005 Aug 13;331(7513):387-391 [doi: 10.1136/bmj.331.7513.387]  
28 [Medline: 16096306].  
29  
30
- 31 56. Veloski JJ, Fields SK, Boex JR, Blank LL. Measuring professionalism: a review of  
32 studies with instruments reported in the literature between 1982 and 2002. *Acad*  
33 *Med*. 2005 Apr;80(4):366-370 [Medline: 15793022].  
34  
35
- 36 57. Rothman DJ. Medical professionalism--focusing on the real issues. *N Engl J*  
37 *Med*. 2000 Apr 27;342(17):1284-1286 [doi: 10.1056/NEJM200004273421711]  
38 [Medline: 10787328].  
39  
40
- 41 58. Cruess RL, Cruess SR. Teaching professionalism: general principles. *Med Teach*.  
42 2006 May;28(3):205-208 [doi: 10.1080/01421590600643653] [Medline: 16753716]  
43  
44
- 45 59. Kassebaum DG, Cutler ER. On the culture of student abuse in medical school. *Acad*  
46 *Med*. 1998 Nov;73(11):1149-1158 [Medline: 9834696].  
47  
48
- 49 60. Wear D, Castellani B. The development of professionalism: curriculum matters. *Acad*  
50 *Med*. 2000 Jun;75(6):602-611 [Medline: 10875504].  
51  
52
- 53 61. Suchman AL, Williamson PR, Litzelman DK, Frankel RM, Mossbarger DL, Inui TS;  
54 Relationship-Centered Care Initiative Discovery Team. Toward an informal  
55 curriculum that teaches professionalism. Transforming the social environment of a  
56 medical school. *J Gen Intern Med*. 2004 May;19(5 Pt 2):501-504 [doi:10.1111/j.1525-  
57 1497.2004.30157.x] [Medline: 15109312].  
58  
59  
60



- 1  
2  
3  
4  
5  
6  
7  
8  
9  
10  
11  
12  
13  
14  
15  
16  
17  
18  
19  
20  
21  
22  
23  
24  
25  
26  
27  
28  
29  
30  
31  
32  
33  
34  
35  
36  
37  
38  
39  
40  
41  
42  
43  
44  
45  
46  
47  
48  
49  
50  
51  
52  
53  
54  
55  
56  
57  
58  
59  
60
62. Lynch DC, Surdyk PM, Eiser AR. Assessing professionalism: a review of the literature. *Med Teach*. 2004 Jun;26(4):366-373.[doi: 10.1080/01421590410001696434] [Medline: 15203852].
  63. Karnieli-Miller O, Vu TR, Holtman MC, Clyman SG, Inui TS. Medical students' professionalism narratives: a window on the informal and hidden curriculum. *Acad Med*. 2010 Jan;85(1):124-133 [doi: 10.1097/ACM.0b013e3181c42896] [Medline: 20042838].
  64. Gruen RL, Pearson SD, Brennan TA. Physician-citizens--public roles and professional obligations. *JAMA*. 2004 Jan 7;291(1):94-98 [doi: 10.1001/jama.291.1.94] [Medline: 14709581].
  65. Brainard AH, Brislen HC. Viewpoint: learning professionalism: a view from the trenches. *Acad Med*. 2007 Nov;82(11):1010-1014 [doi: 10.1097/01.ACM.0000285343.95826.94] [Medline: 17971682].
  66. Steinert Y, Cruess S, Cruess R, Snell L. Faculty development for teaching and evaluating professionalism: from programme design to curriculum change. *Med Educ*. 2005 Feb;39(2):127-36 [doi: 10.1111/j.1365-2929.2004.02069.x] [Medline: 15679679].
  67. Meisel A, Snyder L, Quill T; American College of Physicians--American Society of Internal Medicine End-of-Life Care Consensus Panel. Seven legal barriers to end-of-life care: myths, realities, and grains of truth. *JAMA*. 2000 Nov 15;284(19):2495-2501 [Medline: 11074780].
  68. Hickson GB, Pichert JW, Webb LE, Gabbe SG. A complementary approach to promoting professionalism: identifying, measuring, and addressing unprofessional behaviors. *Acad Med*. 2007 Nov;82(11):1040-1048 [doi: 10.1097/ACM.0b013e31815761ee] [Medline: 17971689].
  69. Greysen SR, Kind T, Chretien KC. Online professionalism and the mirror of social media. *J Gen Intern Med*. 2010 Nov;25(11):1227-1229 [doi: 10.1007/s11606-010-1447-1] [Medline: 20632121]
  70. Eckles RE, Meslin EM, Gaffney M, Helft PR. Medical ethics education: where are we? Where should we be going? A review. *Acad Med*. 2005 Dec;80(12):1143-1152 [Medline: 16306292].
  71. Papadakis MA, Arnold GK, Blank LL, Holmboe ES, Lipner RS. Performance during internal medicine residency training and subsequent disciplinary action by state licensing boards. *Ann Intern Med*. 2008 Jun 3;148(11):869-876 [Medline: 18519932]
  72. MacDonald J, Sohn S, Ellis P. Privacy, professionalism and Facebook: a dilemma for young doctors. *Med Educ*. 2010 Aug;44(8):805-813 [doi: 10.1111/j.1365-2923.2010.03720.x] [Medline: 20633220].

- 1  
2  
3  
4  
5 73. Patenaude J, Niyonsenga T, Fafard D. Changes in students' moral development during  
6 medical school: a cohort study. *CMAJ*. 2003 Apr 1;168(7):840-844 [Medline:  
7 12668541]  
8  
9  
10  
11 74. Papadakis MA, Osborn EH, Cooke M, Healy K. A strategy for the detection and  
12 evaluation of unprofessional behavior in medical students. University of California,  
13 San Francisco School of Medicine Clinical Clerkships Operation Committee. *Acad*  
14 *Med*. 1999 Sep;74(9):980-990 [Medline: 10498089].  
15  
16  
17  
18  
19 75. Lesser CS, Lucey CR, Egener B, Braddock CH 3rd, Linas SL, Levinson W.  
20 A behavioral and systems view of professionalism. *JAMA*. 2010 Dec  
21 22;304(24):2732-7. [doi: 10.1001/jama.2010.1864] [Medline: 21177508].  
22  
23  
24  
25  
26 76. Wear D, Kuczewski MG. The professionalism movement: can we pause? *Am J*  
27 *Bioeth*. 2004 Spring;4(2):1-10 [doi: 10.1162/152651604323097600] [Medline:  
28 15186664].  
29  
30  
31  
32 77. Sargeant J, Armson H, Chesluk B, Dornan T, Eva K, Holmboe E, Lockyer J, Loney  
33 E, Mann K, van der Vleuten C. The processes and dimensions of informed self-  
34 assessment: a conceptual model. *Acad Med*. 2010 Jul;85(7):1212-20. [doi:  
35 10.1097/ACM.0b013e3181d85a4e] [Medline: 20375832].  
36  
37  
38  
39 78. Reynolds PP. Reaffirming professionalism through the education community. *Ann*  
40 *Intern Med*. 1994 Apr 1;120(7):609-614.  
41  
42  
43  
44 79. Aguilar I, Berger ZD, Casher D, Choi RY, Green JB, Harding EG, Jaeger JR, Lavin  
45 A, Martin R, Montgomery LG, Morioka-Douglas N, Murphy JA, Oshman L, Picker  
46 B, Smith SR, Venkatesh S, Williams M, Wright GM. Good Stewardship Working  
47 Group. The "top 5" lists in primary  
48 care: meeting the responsibility of professionalism. *Arch Intern Med*. 2011 Aug  
49 8;171(15):13851390. [doi:10.1001/archinternmed.2011.231].  
50  
51  
52  
53 80. Azer SA, Al-Nassar S. Helping new students become medical professionals: what  
54 medical schools can do. *Acad Med*. 2011 Apr;86(4):408. [doi:  
55 10.1097/ACM.0b013e31820dca04] [Medline: 21451269].  
56  
57  
58  
59  
60

- 1  
2  
3  
4 81. Cheng KL, Dodson TB, Egbert MA, Susarla SM. Which Factors  
5 Affect Citation Rates in the Oral and Maxillofacial Surgery Literature? *J Oral*  
6 *Maxillofac Surg.* 2017 Jul;75(7):1313-1318. [doi: 10.1016/j.joms.2017.03.043].  
7
- 8  
9 82. Gonzales LM, Allum JR, Sowell RS. Graduate enrollment and degrees: 2002 to 2012  
10 (survey report). Washington, Dc: Council of Graduate Schools, 2013. Available at  
11 [http://cgsnet.org/ckfinder/userfiles/files/GEDReport\\_2012.pdf](http://cgsnet.org/ckfinder/userfiles/files/GEDReport_2012.pdf) [Last accessed 30  
12 November 2017].  
13
- 14  
15 83. Jaggi R, Guancial EA, Worobey CC, Henault LE, Chang Y, Starr R, Tarbell  
16 NJ, Hylek EM. The "gender gap" in authorship of academic medical literature--a 35-  
17 year perspective. *N Engl J Med.* 2006 Jul 20;355(3):281-287.  
18
- 19  
20 84. Piper CL, Scheel JR, Lee CI, Forman HP. Gender Trends in Radiology Authorship: A  
21 35-Year Analysis. *AJR Am J Roentgenol.* 2016 Jan;206(1):3-7. [doi:  
22 10.2214/AJR.15.15116].  
23
- 24  
25 85. Valantine HA, Grewal D, Ku MC, Moseley J, Shih MC, Stevenson D, Pizzo PA.  
26 The gender gap in academic medicine: comparing results from a multifaceted  
27 intervention for stanford faculty to peer and national cohorts. *Acad Med.* 2014  
28 Jun;89(6):904-11. [doi: 10.1097/ACM.0000000000000245].  
29
- 30  
31 86. Figg WD, Dunn L, Liewehr DJ, Steinberg SM, Thurman PW, Barrett JC, Birkinshaw  
32 J. Scientific collaboration results in higher citation rates of published articles.  
33 *Pharmacotherapy.* 2006 Jun;26(6):759-767. [doi: 10.1592/phco.26.6.759]  
34 [Medline:16716129].  
35
- 36  
37 87. García-Aroca MÁ, Pandiella-Dominique A, Navarro-Suay R, Alonso-Arroyo  
38 A, Granda-Orive JI, Anguita-Rodríguez F, López-García A. Analysis of Production,  
39 Impact, and Scientific Collaboration on Difficult Airway Through the Web of Science  
40 and Scopus (1981-2013). *Anesth Analg.* 2017 Jun;124(6):1886-1896. [doi:  
41 10.1213/ANE.0000000000002058] [Medline: 28452821].  
42
- 43  
44 88. Tanner-Smith EE, Polanin JR. Brief alcohol intervention trials conducted by higher  
45 prestige authors and published in higher impact factor journals are cited more  
46 frequently. *J Clin Epidemiol.* 2016 Jul;75: 119-125 [doi:  
47 10.1016/j.jclinepi.2016.01.028] [Medline: 26854420].  
48
- 49  
50 89. Nicholson JM, Ioannidis JP. Research grants: Conform and be funded. *Nature.* 2012  
51 Dec 6;492(7427):34-36. [doi: 10.1038/492034a] [Medline: 23222591].  
52
- 53  
54 90. Lauer MS, Danthi NS, Kaltman J, Wu C. Predicting Productivity Returns on  
55 Investment: Thirty Years of Peer Review, Grant Funding, and Publication of Highly  
56 Cited Papers at the National Heart, Lung, and Blood Institute. *Circ Res.* 2015 Jul  
57 17;117(3):239-243. [doi: 10.1161/CIRCRESAHA.115.306830] [Medline: 26089369].  
58  
59  
60

- 1  
2  
3  
4  
5  
6  
7  
8  
9  
10  
11  
12  
13  
14  
15  
16  
17  
18  
19  
20  
21  
22  
23  
24  
25  
26  
27  
28  
29  
30  
31  
32  
33  
34  
35  
36  
37  
38  
39  
40  
41  
42  
43  
44  
45  
46  
47  
48  
49  
50  
51  
52  
53  
54  
55  
56  
57  
58  
59  
60
91. Gok A, Rigby J, Shapira P. The Impact of Research Funding on Scientific Outputs: Evidence from Six Smaller European Countries. *Journal of the Association for Information Science and Technology* 2016; 67 (3): 715-730. [doi.org/10.1002/asi.23406].
  92. Priem J, Hemminger BH. *Scientometrics 2.0: Toward new metrics of scholarly impact on the social Web*. *First Monday* 2010;15. Available at <http://firstmonday.org/htbin/cgiwrap/bin/ojs/index.php/fm/article/view/2874/2570> [Last accessed 30 November 2017].
  93. Garfield E. Citation indexing for studying science. *Nature* 1970;227: 669-671 [Medline: 4914589].
  94. Sud P, Thelwall M. Evaluating altmetrics. *Scientometrics* 2014; 98:1131-1143 [doi 10.1007/s11192-013-1117-2].
  95. Powell AGMT, Bevan V, Brown C, Lewis WG. Altmetric Versus Bibliometric Perspective Regarding Publication Impact and Force. *World J Surg.* 2018 Sep;42(9):2745-2756. doi: 10.1007/s00268-018-4579-9.

## Glossary

**Articles** are scientific written composition representing a substantial advance in the understanding of a topic or problem. They raise questions, provide thoughtful, critical analysis and aim at establishing new directions.

**Research papers** original studies making systematic investigations into a problem, using valid and reliable methods in order to establish answers to the research questions made, and come with conclusions. Research methods used may be qualitative, quantitative or mixed methods.

**Editorial materials** are defined as brief articles that may raise questions, provide current status or new developments/advances in the field or structured as a commentary.

**Reviews** are defined as an article reviewing the progress of knowledge in a particular topic, critically analysing the current status of knowledge and presenting an understanding of the subject by discussing related literature. A review should identify gaps in the literature and highlights future directions for further research.

1  
2  
3  
4  
5  
6  
7  
8  
9  
10  
11  
12  
13  
14  
15  
16  
17  
18  
19  
20  
21  
22  
23  
24  
25  
26  
27  
28  
29  
30  
31  
32  
33  
34  
35  
36  
37  
38  
39  
40  
41  
42  
43  
44  
45  
46  
47  
48  
49  
50  
51  
52  
53  
54  
55  
56  
57  
58  
59  
60

For peer review only

1  
2  
3  
4  
5  
6  
7  
8  
9  
10  
11  
12  
13  
14  
15  
16  
17  
18  
19  
20  
21  
22  
23  
24  
25  
26  
27  
28  
29  
30  
31  
32  
33  
34  
35  
36  
37  
38  
39  
40  
41  
42  
43  
44  
45  
46  
47  
48  
49  
50  
51  
52  
53  
54  
55  
56  
57  
58  
59  
60

For peer review only

1  
2  
3  
4  
5  
6  
7  
8  
9  
10  
11  
12  
13  
14  
15  
16  
17  
18  
19  
20  
21  
22  
23  
24  
25  
26  
27  
28  
29  
30  
31  
32  
33  
34  
35  
36  
37  
38  
39  
40  
41  
42  
43  
44  
45  
46

Appendix 1.

The most cited articles in medical professionalism identified by searching the Web of Science, showing the number of citations and altmetric scores<sup>a</sup>

| Rank | Authors, Year [Reference]               | Article ( <i>Journal</i> )                                                                                                                                           | 2015-JIF | Category           | Number of citations, Web of Knowledge | Average citation per year <sup>b</sup> | Altmetric scores <sup>c</sup> | Origin: First author's organization, location (country)                                       |
|------|-----------------------------------------|----------------------------------------------------------------------------------------------------------------------------------------------------------------------|----------|--------------------|---------------------------------------|----------------------------------------|-------------------------------|-----------------------------------------------------------------------------------------------|
| 1    | Epstein and Hundert, 2002 <sup>30</sup> | Defining and assessing professional competence. ( <i>Journal of the American Medical Association</i> ).                                                              | 37.684   | Review             | 947                                   | 63.13                                  | 24                            | University of Rochester School of Medicine and Dentistry, Rochester, New York (United States) |
| 2    | Blank et al, 2003 <sup>31</sup>         | Medical professionalism in the new millennium: a physician charter 15 months later. ( <i>Annals of Internal Medicine</i> ).                                          | 16.593   | Editorial Material | 804                                   | 53.60                                  | 2                             | ABIM Foundation, 510 Walnut Street, Suite 1700, Philadelphia, Pennsylvania, (United States)   |
| 3    | Epstein, 1999 <sup>32</sup>             | Mindful practice. ( <i>Journal of the American Medical Association</i> ).                                                                                            | 37.684   | Review             | 588                                   | 32.66                                  | 12                            | University of Rochester School of Medicine and Dentistry, Rochester, New York (United States) |
| 4    | Brennan et al, 2006 <sup>33</sup>       | Health industry practices that create conflicts of interest: a policy proposal for academic medical centers. ( <i>Journal of the American Medical Association</i> ). | 37.684   | Article            | 400                                   | 36.36                                  | 37                            | Brigham and Women's Hospital, Harvard Medical School, Boston, Massachusetts (United States)   |
| 5    | Papadakis, et al, 2005 <sup>34</sup>    | Disciplinary action by medical boards and prior behavior in medical school. ( <i>New England Journal of Medicine</i> ).                                              | 59.558   | Research           | 313                                   | 26.08                                  | 34                            | School of Medicine, University of California, San Francisco, San Francisco, (United States).  |

|    |                                     |                                                                                                                                                    |        |          |     |       |     |                                                                                                                                                         |
|----|-------------------------------------|----------------------------------------------------------------------------------------------------------------------------------------------------|--------|----------|-----|-------|-----|---------------------------------------------------------------------------------------------------------------------------------------------------------|
| 6  | Swick, 2000 <sup>35</sup>           | Toward a normative definition of medical professionalism. ( <i>Academic Medicine</i> ).                                                            | 4.194  | Article  | 239 | 14.05 | 0   | Institute of Medicine and Humanities, Saint Patrick Hospital and the University of Montana, Missoula ( <i>United States</i> ).                          |
| 7  | Arnold, 2002 <sup>36</sup>          | Assessing professional behavior: yesterday, today, and tomorrow. ( <i>Academic Medicine</i> )                                                      | 4.194  | Review   | 211 | 14.07 | 0   | University of Missouri-Kansas City School of Medicine, ( <i>United States</i> ).                                                                        |
| 8  | Papadakis et al, 2004 <sup>37</sup> | Unprofessional behavior in medical school is associated with subsequent disciplinary action by a state medical board. ( <i>Academic Medicine</i> ) | 4.194  | Research | 208 | 16.00 | 2   | Department of Medicine, University of California, San Francisco ( <i>United States</i> )                                                                |
| 9  | Neumann et al, 2011 <sup>38</sup>   | Empathy decline and its reasons: a systematic review of studies with medical students and residents. ( <i>Academic Medicine</i> )                  | 4.194  | Review   | 202 | 33.67 | 155 | Integrative and Anthroposophic Medicine, Faculty of Health, Department of Medicine, University of Witten/Herdecke, ( <i>Germany</i> ).                  |
| 10 | Chretien et al, 2009 <sup>39</sup>  | Online posting of unprofessional content by medical students. ( <i>Journal of the American Medical Association</i> )                               | 37.684 | Research | 179 | 22.38 | 55  | Medical Center and Department of Medicine, George Washington University School of Medicine and Health Sciences, Washington, DC ( <i>United States</i> ) |



|    |                                    |                                                                                                                                                        |        |                    |     |       |    |                                                                                                                      |
|----|------------------------------------|--------------------------------------------------------------------------------------------------------------------------------------------------------|--------|--------------------|-----|-------|----|----------------------------------------------------------------------------------------------------------------------|
| 11 | Kenny et al, 2003 <sup>40</sup>    | Role modeling in physicians' professional formation: reconsidering an essential but untapped educational strategy. ( <i>Academic Medicine</i> ).       | 4.194  | Article            | 176 | 12.57 | 0  | Department of Bioethics, Dalhousie University Faculty of Medicine, Halifax, Nova Scotia, ( <i>Canada</i> ).          |
| 12 | Dyrbye et al, 2010 <sup>41</sup>   | Relationship between burnout and professional conduct and attitudes among US medical students. ( <i>Journal of the American Medical Association</i> ). | 37.684 | Research           | 170 | 24.28 | 80 | Mayo Clinic College of Medicine, Rochester, Minnesota, ( <i>United States</i> )                                      |
| 13 | Swick et al, 1999 <sup>42</sup>    | Teaching professionalism in undergraduate medical education. ( <i>Journal of the American Medical Association</i> ).                                   | 37.684 | Research           | 168 | 9.33  | 0  | Association of American Medical Colleges, Washington, DC ( <i>United States</i> )                                    |
| 14 | Thompson et al, 2008 <sup>43</sup> | The intersection of online social networking with medical professionalism. ( <i>Journal of General Internal Medicine</i> ).                            | 3.494  | Research           | 166 | 18.44 | 19 | Department of Pediatrics, College of Medicine, University of Florida, Gainesville, Florida, ( <i>United States</i> ) |
| 15 | Wynia et al, 1999 <sup>44</sup>    | Medical professionalism in society ( <i>New England Journal of Medicine</i> )                                                                          | 59.558 | Editorial Material | 165 | 9.17  | 6  | American Medical Association, Chicago, Illinois ( <i>United States</i> ).                                            |
| 16 | Newton et al, 2008 <sup>45</sup>   | Is there hardening of the heart during medical school? ( <i>Academic Medicine</i> )                                                                    | 4.194  | Research           | 164 | 18.22 | 34 | University of Arkansas for Medical Sciences, 4301 W. Markham St., Arkansas ( <i>United States</i> ).                 |

|    |                                           |                                                                                                                                         |       |          |     |       |    |                                                                                                                 |
|----|-------------------------------------------|-----------------------------------------------------------------------------------------------------------------------------------------|-------|----------|-----|-------|----|-----------------------------------------------------------------------------------------------------------------|
| 17 | Coulehan and Williams, 2001 <sup>46</sup> | Vanquishing virtue: The impact of medical education ( <i>Academic Medicine</i> ).                                                       | 4.194 | Article  | 163 | 10.19 | 0  | Helath Science Center, State University of New York at Stony Brook, ( <i>United States</i> )                    |
| 18 | Coulehan, 2005 <sup>47</sup>              | Viewpoint. Today's professionalism: Emerging the mind but not the heart ( <i>Academic Medicine</i> ).                                   | 4.194 | Article  | 151 | 12.58 | 0  | Helath Science Center, State University of New York at Stony Brook, ( <i>United States</i> )                    |
| 19 | Thomas et al, 2007 <sup>48</sup>          | How do distress and well-being relate to medical student empathy? A multicenter study. ( <i>Journal of General Internal Medicine</i> ). | 3.494 | Research | 135 | 13.50 | 0  | Department of Internal Medicine, Mayo Clinic, Rochester, Minnesota, ( <i>United States</i> )                    |
| 20 | Hilton and Slotnick, 2005 <sup>49</sup>   | Proto-professionalism: how professionalisation occurs across the continuum of medical education. ( <i>Medical Education</i> ).          | 3.369 | Article  | 134 | 11.17 | 4  | Department of Community Health Sciences, St. George's Hospital Medical School, London ( <i>United Kingdom</i> ) |
| 21 | Cruess and Cruess, 1997 <sup>50</sup>     | Teaching medicine as a profession in the service of healing. ( <i>Academic Medicine</i> )                                               | 4.194 | Review   | 131 | 6.55  | 0  | McGill University Faculty of Medicine, Montreal, Quebec, ( <i>Canada</i> ).                                     |
| 22 | Audet et al, 2005 <sup>51</sup>           | Measure, learn, and improve: physicians' involvement in quality improvement. <i>Health Affairs (Millwood)</i> .                         | 5.230 | Article  | 126 | 10.5  | 12 | American Medical Association, Ccommonwealth Fund, New York City, NY, ( <i>United States</i> ).                  |

|    |                                      |                                                                                                                                                         |        |                    |     |       |   |                                                                                                                                     |
|----|--------------------------------------|---------------------------------------------------------------------------------------------------------------------------------------------------------|--------|--------------------|-----|-------|---|-------------------------------------------------------------------------------------------------------------------------------------|
| 23 | Wong et al, 2010 <sup>52</sup>       | Teaching quality improvement and patient safety to trainees: a systematic review. ( <i>Academic Medicine</i> )                                          | 4.194  | Review             | 122 | 17.43 | 3 | Department of Medicine, University of Toronto, Toronto, Ontario, ( <i>Canada</i> ).                                                 |
| 24 | Eva et al, 2004 <sup>53</sup>        | How can I know what I don't know? Poor self assessment in a well-defined domain. ( <i>Advances in Health Sciences Education Theory and Practices.</i> ) | 2.452  | Article            | 120 | 9.23  | 7 | Program for Educational Research and Development, Room 101, Building T-13, McMaster University, Hamilton, Ontario ( <i>Canada</i> ) |
| 25 | Campbell et al, 2007 <sup>54</sup>   | Professionalism in medicine: results of a national survey of physicians. ( <i>Annals of Internal Medicine</i> ).                                        | 16.593 | Research           | 114 | 11.40 | 7 | Massachusetts General Hospital, Institute for Health Policy, Boston, Massachusetts ( <i>United States</i> )                         |
| 26 | Littlewood et al, 2005 <sup>55</sup> | Early practical experience and the social responsiveness of clinical education: systematic review. ( <i>British Medical Journal</i> )                   | 19.697 | Review             | 111 | 9.25  | 1 | University of Manchester School of Medicine, Manchester ( <i>United Kingdom</i> ).                                                  |
| 27 | Veloski et al, 2005 <sup>56</sup>    | Measuring professionalism: a review of studies with instruments reported in the literature between 1982 and 2002. ( <i>Academic Medicine</i> ).         | 4.194  | Review             | 103 | 8.58  | 0 | Jefferson Medical College, Philadelphia, Pennsylvania ( <i>United States</i> )                                                      |
| 28 | Rothman, 2000 <sup>57</sup>          | Medical professionalism--focusing on the real issues. ( <i>New England Journal of Medicine</i> )                                                        | 59.558 | Editorial Material | 102 | 6.00  | 3 | Columbia University College of Physicians and Surgeons, New York, ( <i>United States</i> ).                                         |

|    |                                          |                                                                                                                                                                      |       |                    |     |      |    |                                                                                                                                                |
|----|------------------------------------------|----------------------------------------------------------------------------------------------------------------------------------------------------------------------|-------|--------------------|-----|------|----|------------------------------------------------------------------------------------------------------------------------------------------------|
| 29 | Cruess and Cruess, 2006 <sup>58</sup>    | Teaching Professionalism: general principles ( <i>Medical Teacher</i> ).                                                                                             | 2.355 | Editorial Material | 101 | 9.18 | 3  | Centre for Medical Education, Lady Meredith House, McGill University, Montreal, Quebec, ( <i>Canada</i> ).                                     |
| 30 | Kassebaum and Cutler, 1998 <sup>59</sup> | On the culture of student abuse in medical school ( <i>Academic Medicine</i> )                                                                                       | 4.194 | Article            | 101 | 5.32 | 0  | Division of Medical School Standards and Assessment, Association of American Medical Colleges (AAMC), Washington, DC ( <i>United States</i> ). |
| 31 | Wear and Castellani, 2000 <sup>60</sup>  | The development of professionalism: Curriculum matters ( <i>Academic Medicine</i> )                                                                                  | 4.194 | Article            | 100 | 5.88 | 0  | Northeastern Ohio Universities College of Medicine, Rootstown ( <i>United States</i> ).                                                        |
| 32 | Suchman et al, 2004 <sup>61</sup>        | Toward an informal curriculum that teaches professionalism. Transforming the social environment of a medical school. ( <i>Journal of General Internal Medicine</i> ) | 3.494 | Article            | 99  | 7.61 | 21 | Relationship-Centered Healthcare, Rochester, New York ( <i>United States</i> ).                                                                |
| 33 | Lynch et al, 2004 <sup>62</sup>          | Assessing professionalism: a review of the literature ( <i>Medical Teacher</i> )                                                                                     | 2.355 | Review             | 98  | 7.54 | 1  | Accreditation Council for Graduate Medical Education, Chicago, Illinois, ( <i>United States</i> )                                              |

|    |                                           |                                                                                                                                           |        |          |    |       |    |                                                                                                                                                                  |
|----|-------------------------------------------|-------------------------------------------------------------------------------------------------------------------------------------------|--------|----------|----|-------|----|------------------------------------------------------------------------------------------------------------------------------------------------------------------|
|    |                                           |                                                                                                                                           |        |          |    |       |    |                                                                                                                                                                  |
| 34 | Karnieli-Miller et al, 2010 <sup>63</sup> | Medical students' professionalism narratives: a window on the informal and hidden curriculum. ( <i>Academic Medicine</i> )                | 4.194  | Research | 97 | 13.86 | 20 | Department of Community Mental Health, Focus for Excellence in Patient-Professional Relationships in Health Care, University of Haifa, Haifa, ( <i>Israel</i> ). |
| 35 | Gruen et al, 2004 <sup>64</sup>           | Physician-citizens- Public roles and professional obligations ( <i>Journal of the American Medical Association</i> )                      | 37.684 | Article  | 97 | 7.46  | 14 | Harvard School of Public Health, Harvard Medical School, Boston, Mass, ( <i>United States</i> )                                                                  |
| 36 | Brainard and Brislen, 2007 <sup>65</sup>  | Viewpoint: Learning professionalism: A view from the trenches ( <i>Academic Medicine</i> ).                                               | 4.194  | Article  | 96 | 9.60  | 14 | University of New Mexico School of Medicine, Albuquerque, New Mexico, ( <i>United States</i> ).                                                                  |
| 37 | Steinert et al, 2005 <sup>66</sup>        | Faculty development for teaching and evaluating professionalism: from programme design to curriculum change. ( <i>Medical Education</i> ) | 3.369  | Research | 96 | 8.00  | 0  | Centre for Medical Education, Faculty of Medicine, McGill University, Lady Meredith House, Montreal, Quebec, ( <i>Canada</i> ).                                  |
| 38 | Meisel et al, 2000 <sup>67</sup>          | Seven legal barriers to end-of-life care- Myths, realities, and grains of truth ( <i>Journal of the American Medical Association</i> )    | 37.684 | Article  | 95 | 5.59  | 0  | Center for Ethics and Professionalism, American College of Physicians- American Society of Internal Medicine, Philadelphia, PA ( <i>United States</i> )          |

|    |                                     |                                                                                                                                                               |        |          |    |       |    |                                                                                                                                                  |
|----|-------------------------------------|---------------------------------------------------------------------------------------------------------------------------------------------------------------|--------|----------|----|-------|----|--------------------------------------------------------------------------------------------------------------------------------------------------|
| 39 | Hickson, et al, 2007 <sup>68</sup>  | A complementary approach to promoting professionalism: identifying, measuring, and addressing unprofessional behaviors. ( <i>Academic Medicine</i> ).         | 4.194  | Article  | 93 | 9.30  | 18 | Department of Medical Education and Administration, University Medical Center, Nashville, Tennessee ( <i>United States</i> )                     |
| 40 | Greysen et al, 2010 <sup>69</sup>   | Online professionalism and the mirror of social media ( <i>Journal of General Internal Medicine</i> ).                                                        | 3.494  | Article  | 91 | 13.00 | 61 | Yale University School of Medicine, New Haven, CT ( <i>United States</i> ).                                                                      |
| 41 | Eckles et al, 2005 <sup>70</sup>    | Medical ethics education: where are we? Where should we be going? A review. ( <i>Academic Medicine</i> )                                                      | 4.194  | Review   | 90 | 7.50  | 9  | Division of Hematology/Oncology, Indiana University School of Medicine, Indianapolis, IN ( <i>United States</i> )                                |
| 42 | Papadakis et al, 2008 <sup>71</sup> | Performance during internal medicine residency training and subsequent disciplinary action by state licensing boards. ( <i>Annals of Internal Medicine</i> ). | 16.593 | Research | 89 | 9.89  | 9  | University of California at San Francisco, San Francisco, California ( <i>United States</i> ).                                                   |
| 43 | MacDonald et al, 2010 <sup>72</sup> | Privacy, professionalism and Facebook: a dilemma for young doctors. ( <i>Medical Education</i> )                                                              | 3.369  | Research | 87 | 12.43 | 27 | Department of Psychological Medicine, University of Otago, Wellington School of Medicine and Health Sciences, Wellington ( <i>New Zealand</i> ). |

|    |                                        |                                                                                                                                                                                                                              |        |          |    |       |    |                                                                                                                                                 |
|----|----------------------------------------|------------------------------------------------------------------------------------------------------------------------------------------------------------------------------------------------------------------------------|--------|----------|----|-------|----|-------------------------------------------------------------------------------------------------------------------------------------------------|
| 44 | Patenaude et al, 2003 <sup>73</sup>    | Changes in students' moral development during medical school: a cohort study. ( <i>Canadian Medical Association Journal</i> ).                                                                                               | 6.724  | Research | 87 | 6.21  | 10 | Faculty of Medicine, University of Sherbrooke and the Centre for Clinical Research, Centre hospitalier universitaire de Sherbrooke, QC (Canada) |
| 45 | Papadakis et al, 1999 <sup>74</sup>    | A strategy for the detection and evaluation of unprofessional behavior in medical students. University of California, San Francisco School of Medicine Clinical Clerkships Operation Committee. ( <i>Academic Medicine</i> ) | 4.194  | Article  | 86 | 4.77  | 3  | University of California at San Francisco, San Francisco, California ( <i>United States</i> ).                                                  |
| 46 | Lesser et al, 2010 <sup>75</sup>       | A behavioral and systems view of professionalism ( <i>Journal of the American Medical Association</i> )                                                                                                                      | 37.684 | Article  | 83 | 11.86 | 36 | Foundation Programs, American Board of Internal Medicine Foundation, Philadelphia, Pennsylvania, ( <i>United States</i> )                       |
| 47 | Wear and Kuczewski, 2004 <sup>76</sup> | The professionalism movement: Can we pause? ( <i>American Journal of Bioethics</i> )                                                                                                                                         | 6.500  | Article  | 83 | 6.38  | 0  | College of Medicine, Northeastern Ohio Universities, ( <i>United States</i> ).                                                                  |
| 48 | Sargeant et al, 2010 <sup>77</sup>     | The process and dimensions of informed self-assessment: a conceptual model ( <i>Academic Medicine</i> )                                                                                                                      | 4.194  | Research | 82 | 11.71 | 2  | Dalhousie University, Halifax, Nova Scotia, ( <i>Canada</i> ).                                                                                  |
| 49 | Reynolds, 1994 <sup>78</sup>           | Reaffirming professionalism through the education community ( <i>Annals of Internal Medicine</i> )                                                                                                                           | 16.593 | Review   | 80 | 3.48  | 0  | Robert Wood Johnson Foundation, Clinical Scholars Program, University of Pennsylvania                                                           |

|    |                                         |                                                                                                                                    |        |          |    |       |    |                                                                                                 |
|----|-----------------------------------------|------------------------------------------------------------------------------------------------------------------------------------|--------|----------|----|-------|----|-------------------------------------------------------------------------------------------------|
|    |                                         |                                                                                                                                    |        |          |    |       |    | School of Medicine,<br>Philadelphia ( <i>United States</i> )                                    |
| 50 | Aguilar<br>et al,<br>2011 <sup>79</sup> | The “top 5” lists in primary care<br>meeting the responsibility of<br>professionalism ( <i>Archives of Internal<br/>Medicine</i> ) | 17.333 | Research | 78 | 13.00 | 61 | School of Medicine,<br>University of Colorado,<br>Aurora, Colorado ( <i>United<br/>States</i> ) |

<sup>a</sup> The search was conducted in May 2017 by searching the Web of Knowledge (1900 to 2016).

<sup>b</sup> For articles with the same number of citations, the average citation per year (number of citations/number of years since publication) was used to judge the ranking. Articles with a higher average citation per year were considered higher in ranking than an article with the same number of citations but a lower average citation per year.

<sup>c</sup> The Altmetric scores were calculated at the publisher website of each article by using the Altmetric Bookmarklet Application (<https://www.altmetric.com/products/free-tools/bookmarklet/>).



1  
2  
3  
4  
5  
6  
7  
8  
9  
10  
11  
12  
13  
14  
15  
16  
17  
18  
19  
20  
21  
22  
23  
24  
25  
26  
27  
28  
29  
30  
31  
32  
33  
34  
35  
36  
37  
38  
39  
40  
41  
42  
43  
44  
45  
46

For peer review only
